# Supplementary material for: Epigenetic Modifiers Induce Bioactive Phenolic Metabolites in the Marine-Derived Fungus Penicillium brevicompactum
Source: PubMed Central journal article supplement (PMC6117726; doi:10.3390/md16080253), 2018-07-30
Supplement: marinedrugs-16-00253-s001.pdf [file marinedrugs-16-00253-s001.pdf]

SUPPLEMENTARY MATERIAL

**Epigenetic modifiers induce bioactive phenolic metabolites in the marine-derived fungus *Penicillium brevicompactum*.**

Seham S. El-Hawary<sup>1</sup>, Ahmed M. Sayed<sup>2,3</sup>, Rabab Mohammed<sup>2</sup>, Hossam M. Hassan<sup>2</sup>, Mohamed A. Zaki<sup>2</sup>, Mostafa E. Rateb<sup>2,4,5</sup>, Tarek A. Mohammed<sup>6</sup>, and Usama Ramadan Abdelmohsen<sup>7\*</sup>.

<sup>1</sup>*Pharmacognosy Dept., Faculty of Pharmacy, Cairo University, Cairo, Egypt 11787,*

<sup>2</sup>*Pharmacognosy Dept., Faculty of Pharmacy, Beni-Suef University, Beni-Suef, Egypt 62514,*

<sup>3</sup>*Pharmacognosy Dept., Faculty of Pharmacy, Nahda University, Beni-Suef, Egypt 62513,*

<sup>4</sup>*Marine Biodiscovery Centre, University of Aberdeen, Scotland, UK, AB24 3UE,*

<sup>5</sup>*School of Computing, Engineering and Physical Sciences, University of the West of Scotland, Paisley PA1 2BE, UK,*

<sup>6</sup>*Marine Invertebrates, National Institute of Oceanography and Fisheries, Red Sea Branch, Hurghada, Egypt 84511,*

<sup>7</sup>*Department of Pharmacognosy, Faculty of Pharmacy, Minia University, Minia, Egypt 61519.*

\*Correspondence: Usama Ramadan Abdelmohsen, [ramadanusama80@gmail.com](mailto:ramadanusama80@gmail.com), +201111595772.

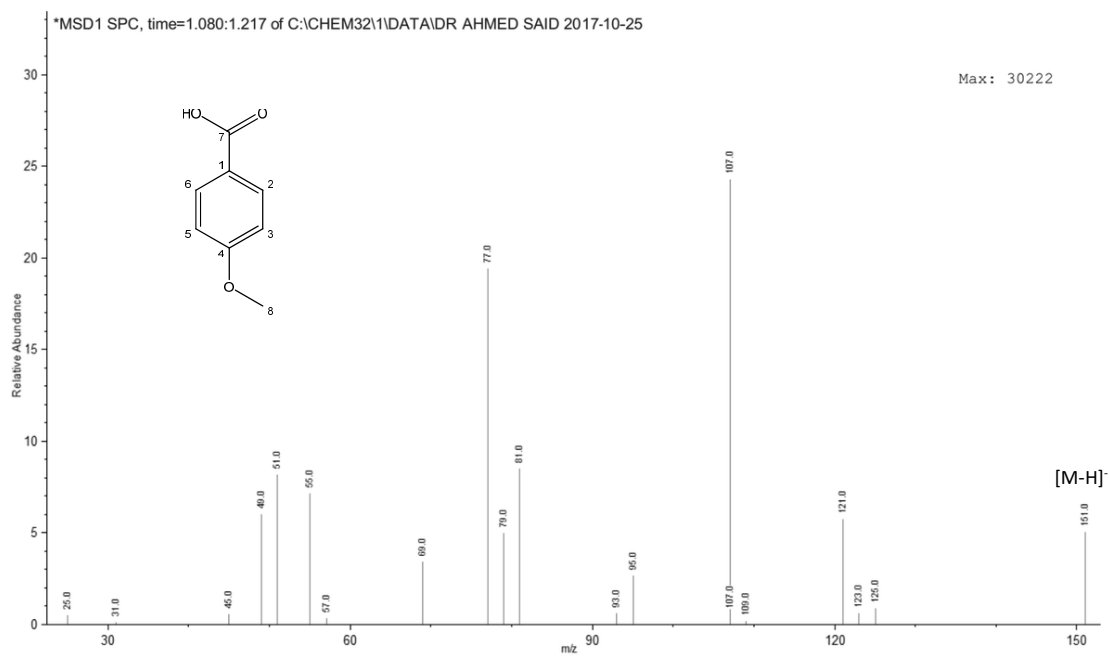

**Fig. S1. ESI-MS spectrum of *p*-anisic acid (1)**

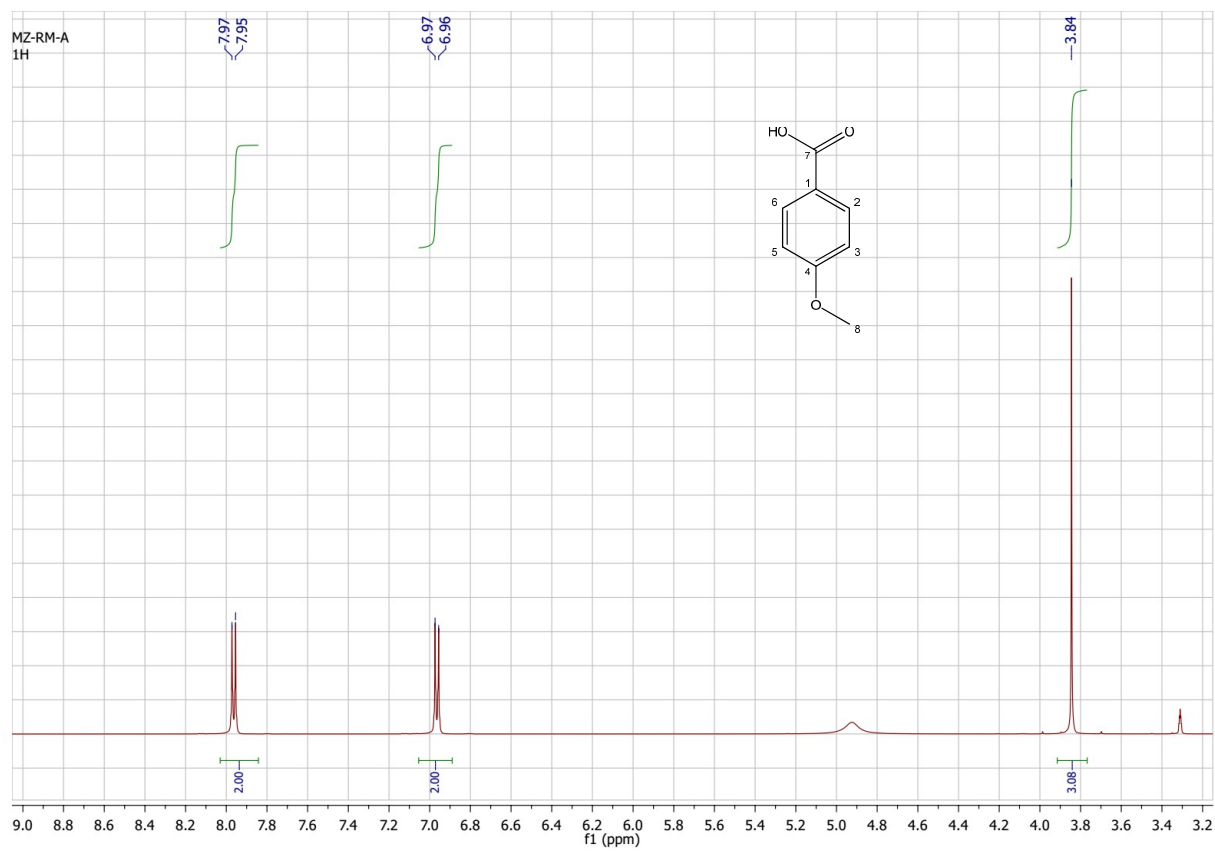

Fig. S2. <sup>1</sup>H NMR spectrum of *p*-anisic acid (1) in CD<sub>3</sub>OD.

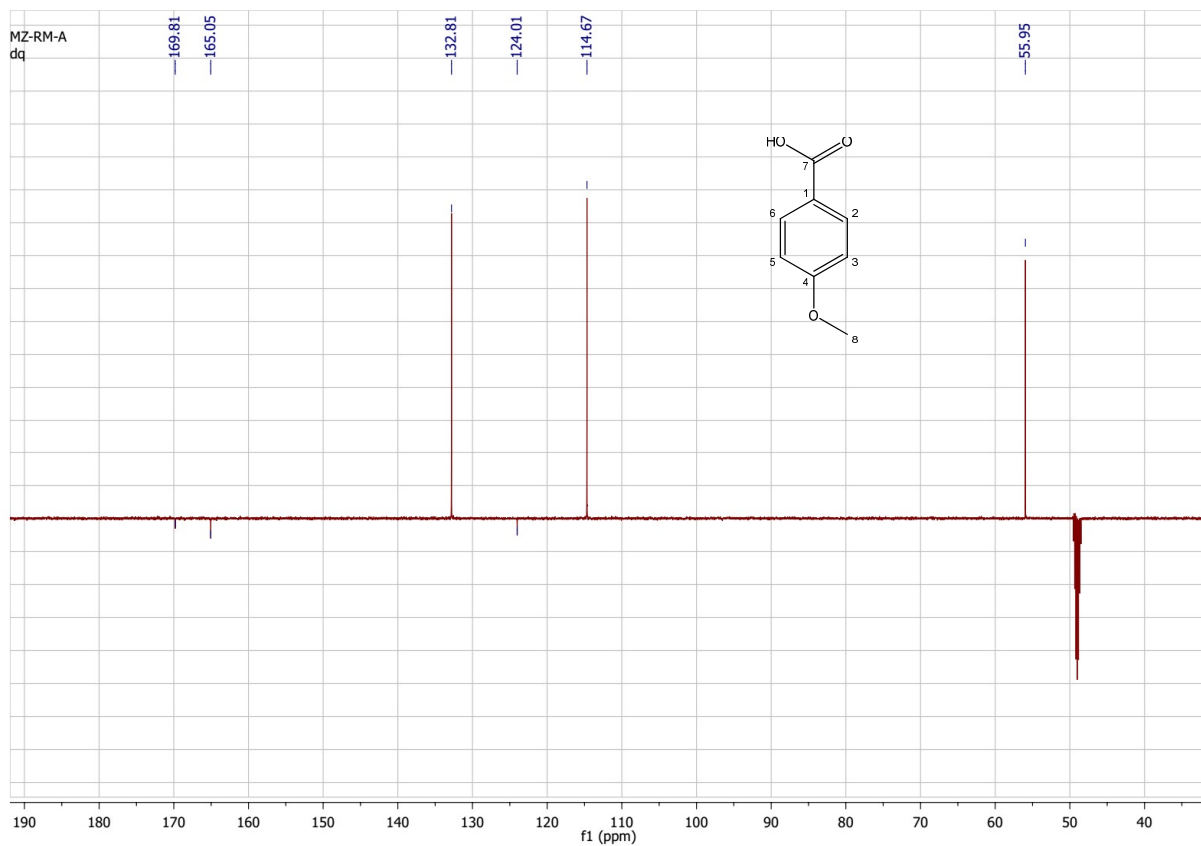

**Fig. S3.** DEPTQ spectrum of *p*-anisic acid (**1**) in CD<sub>3</sub>OD.

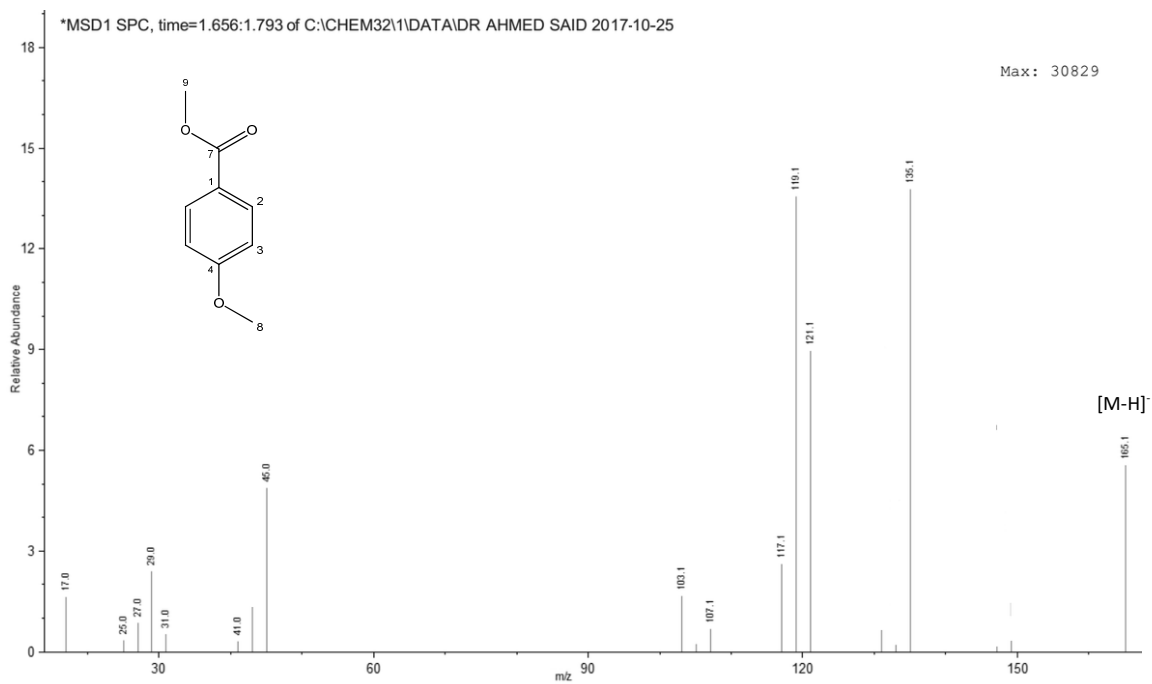

**Fig. S4.** ESI-MS spectrum of *p*-anisic acid methyl ester (2)

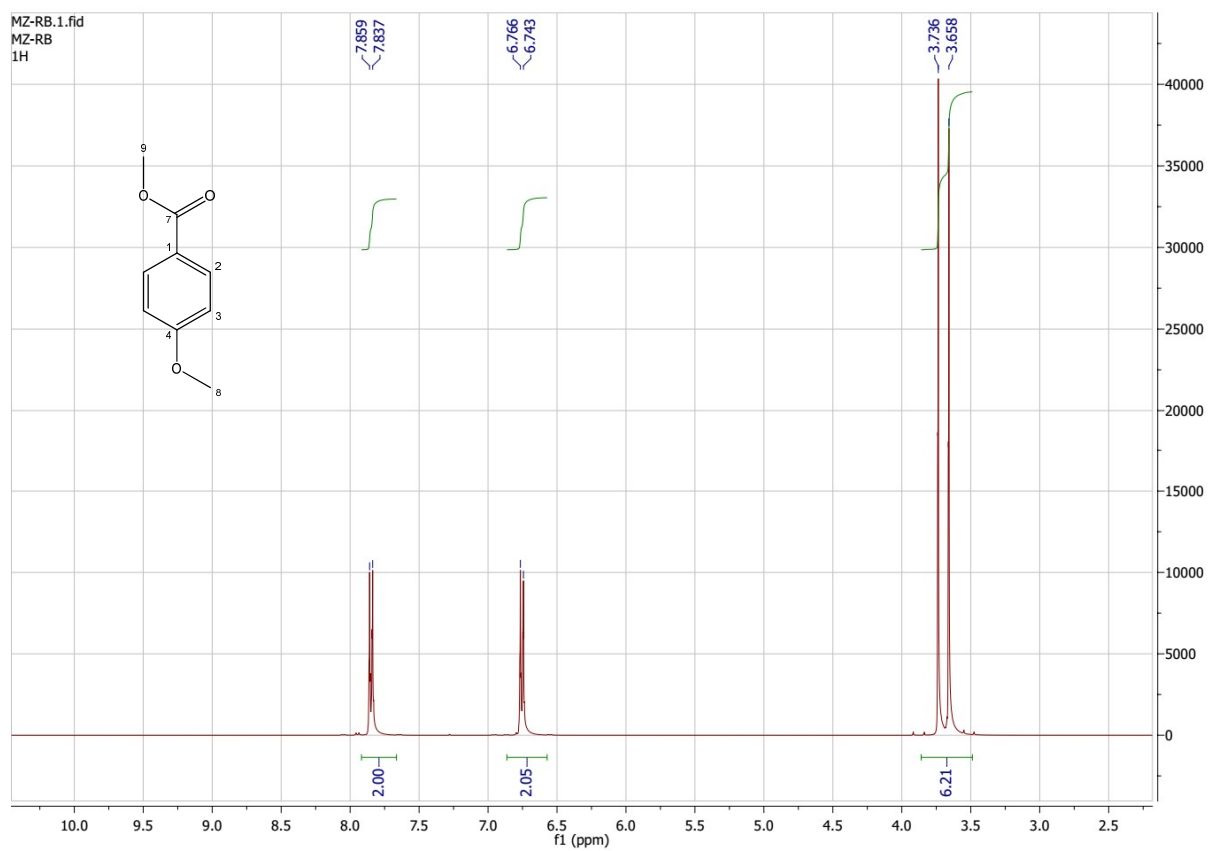

Fig. S5. <sup>1</sup>H NMR spectrum of *p*-anisic acid methyl ester (2) in CDCl<sub>3</sub>

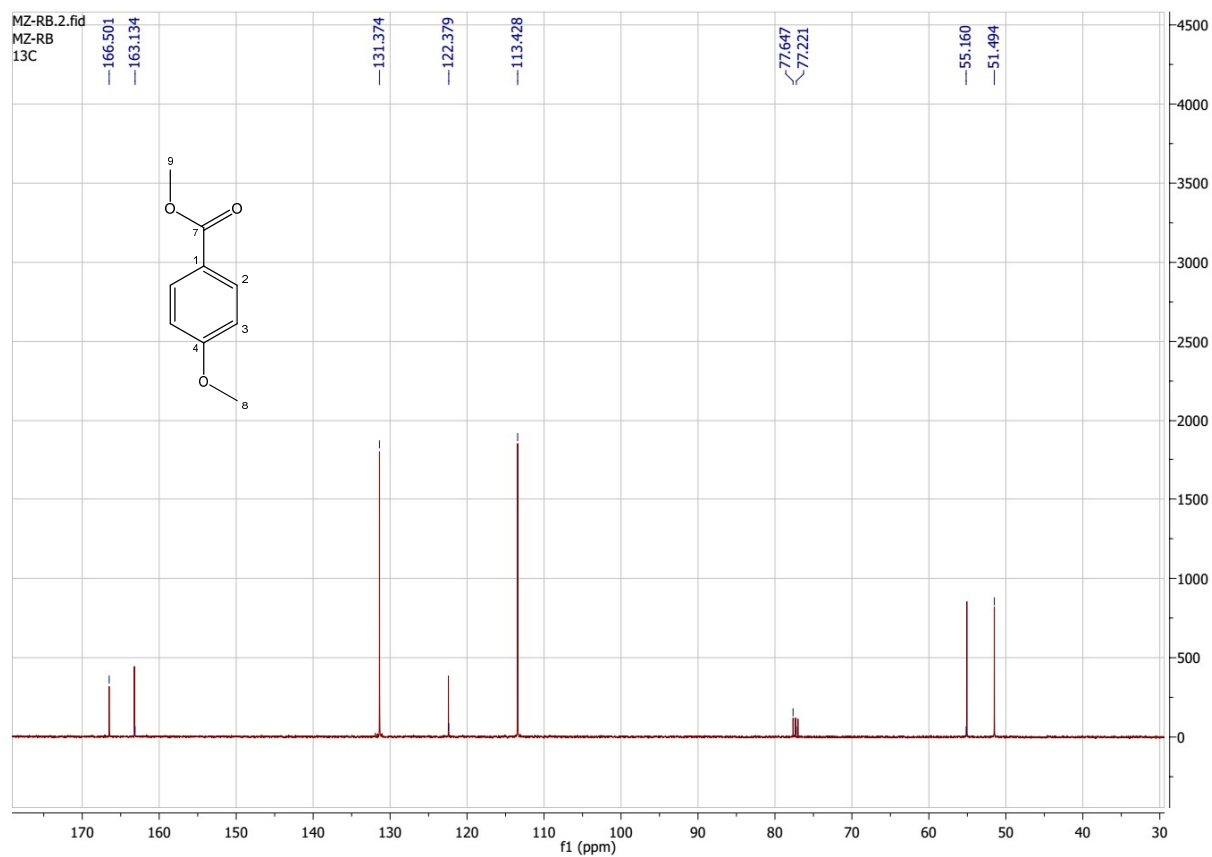

**Fig. S6.** <sup>13</sup>C NMR spectrum of *p*-anisic acid methyl ester (2) in CDCl<sub>3</sub>

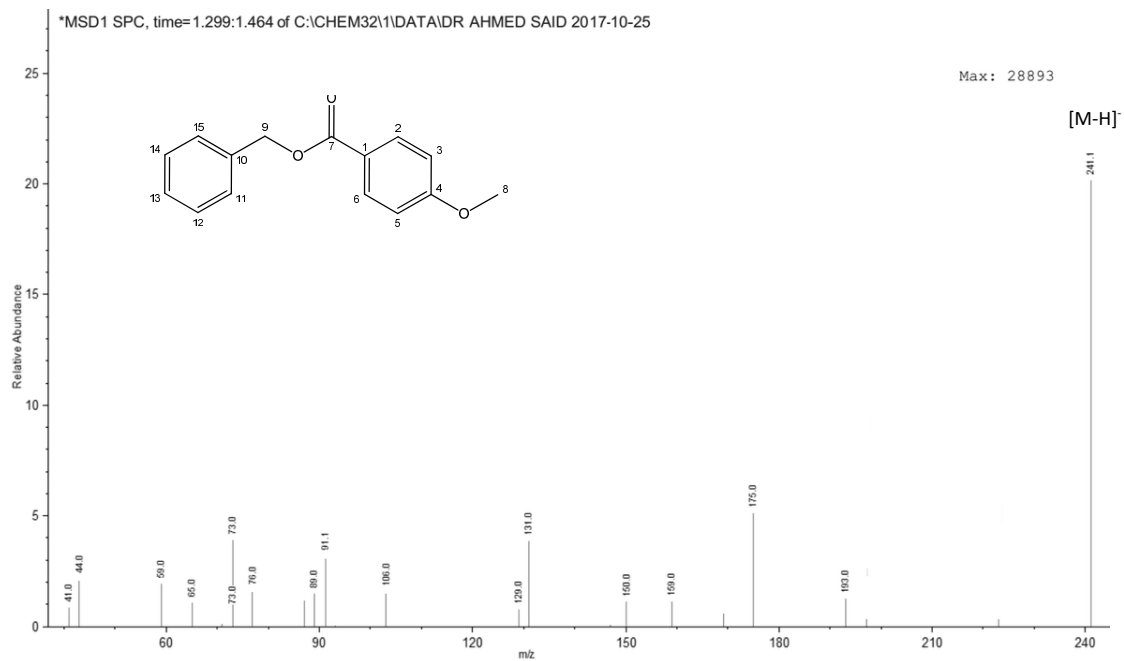

**Fig. S7.** ESI-MS spectrum of benzyl anisate (3)



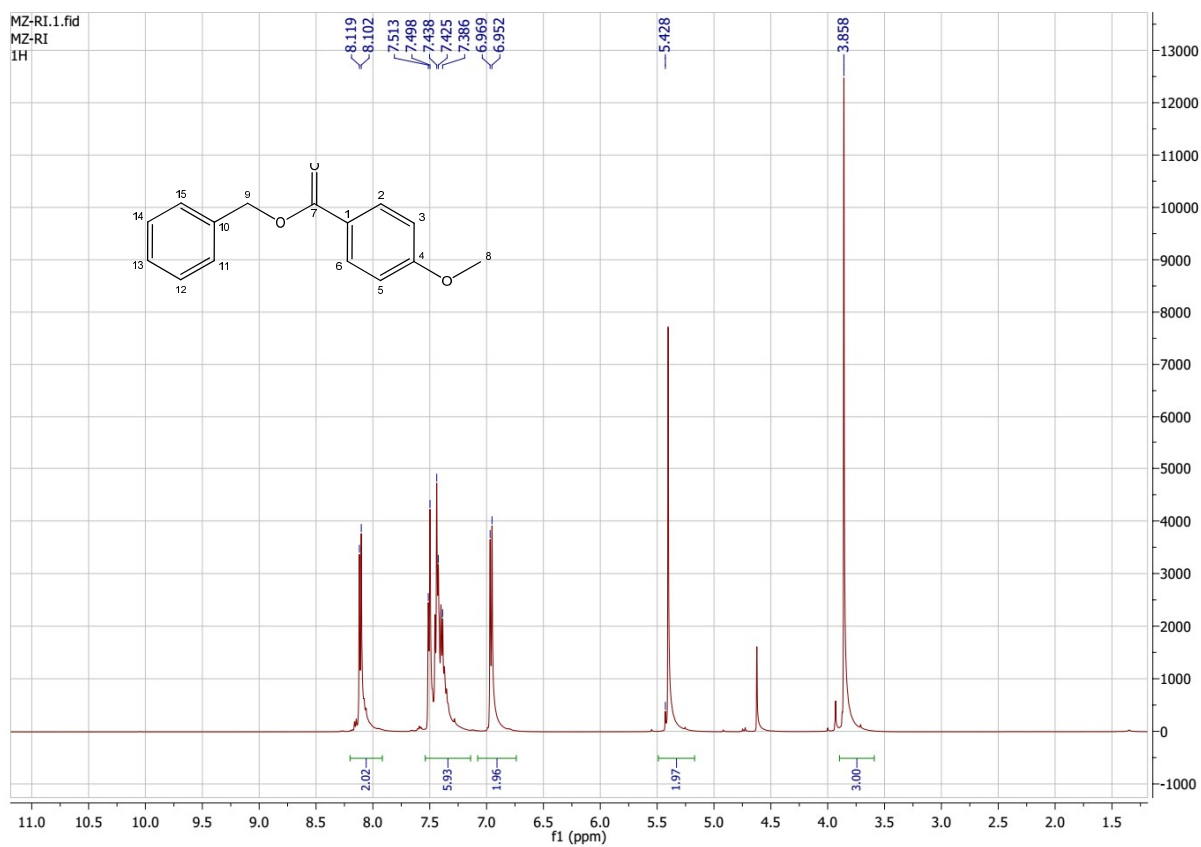

Fig. S8.  $^1\text{H}$  NMR spectrum of benzyl anisate (3) in  $\text{CDCl}_3$

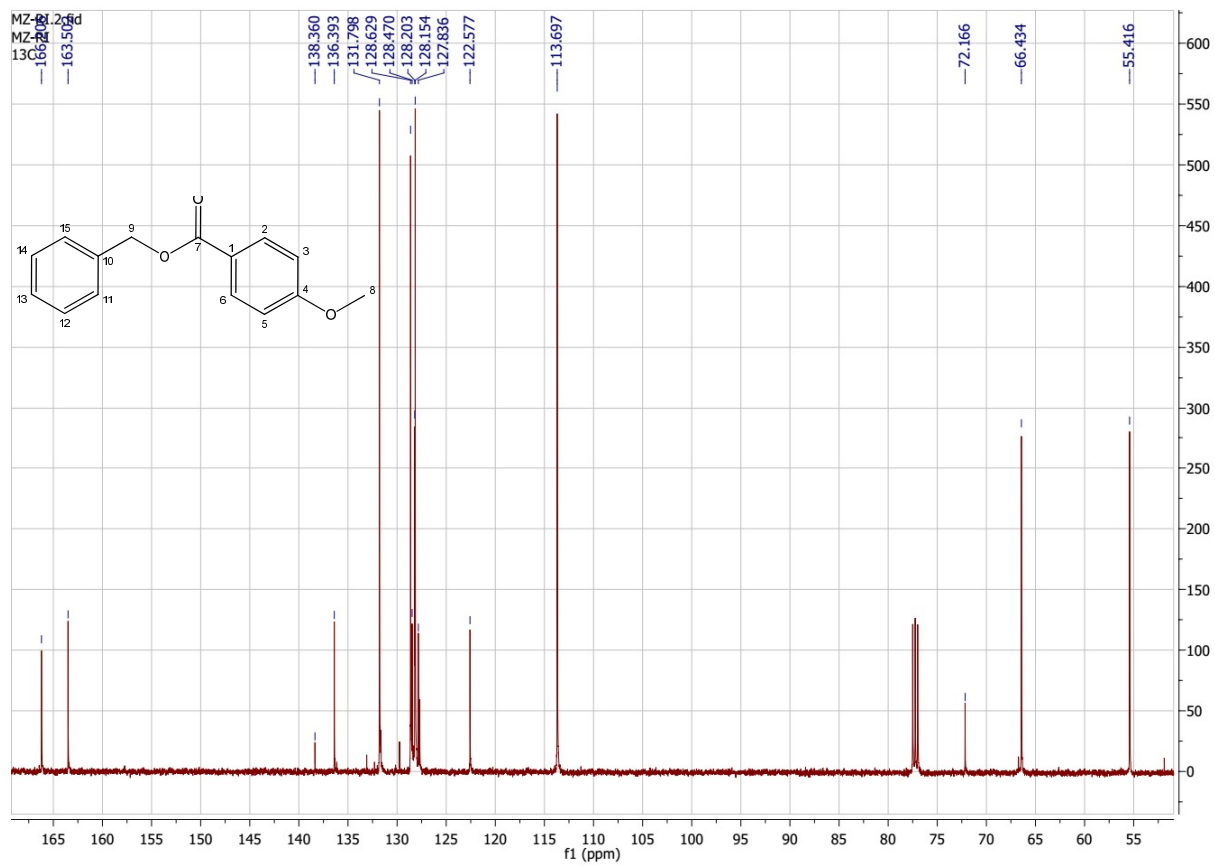

Fig. S9.  $^{13}\text{C}$  NMR spectrum of benzyl anisate (3) in  $\text{CDCl}_3$

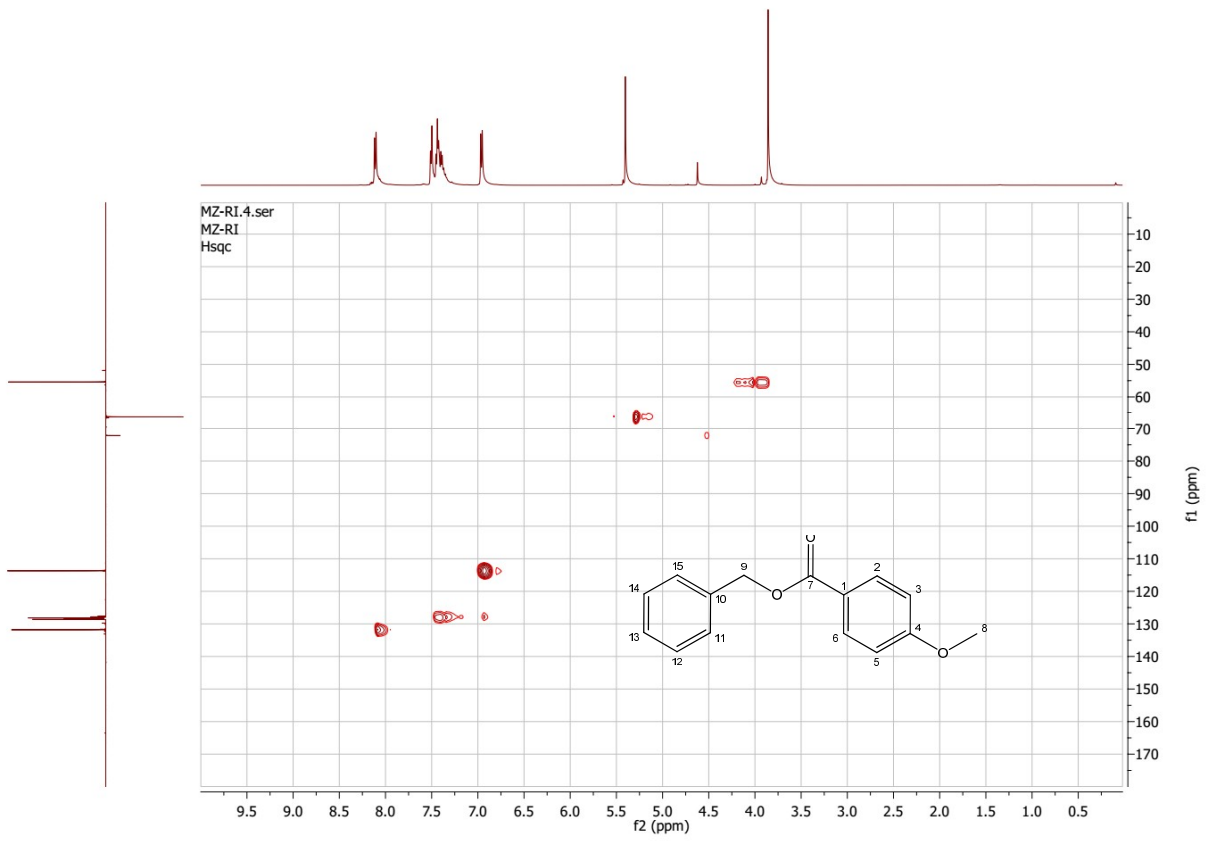

**Fig. S10. HSQC spectrum of benzyl anisate (3)**



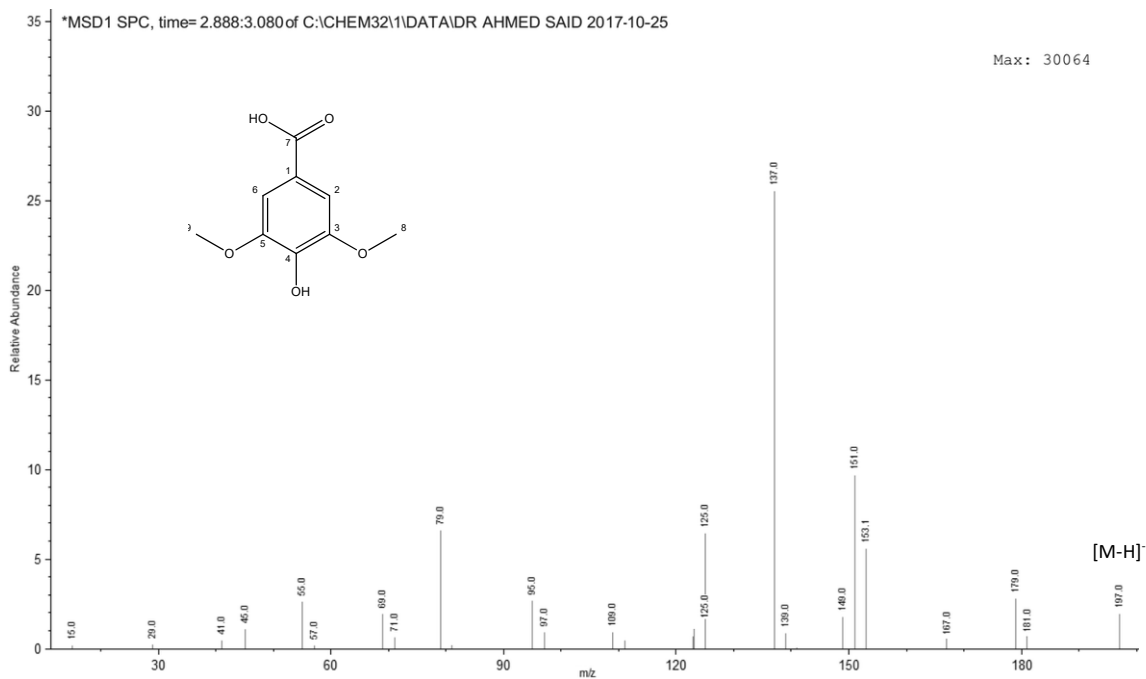

**Fig. S12. ESI-MS spectrum of syringic acid (4)**

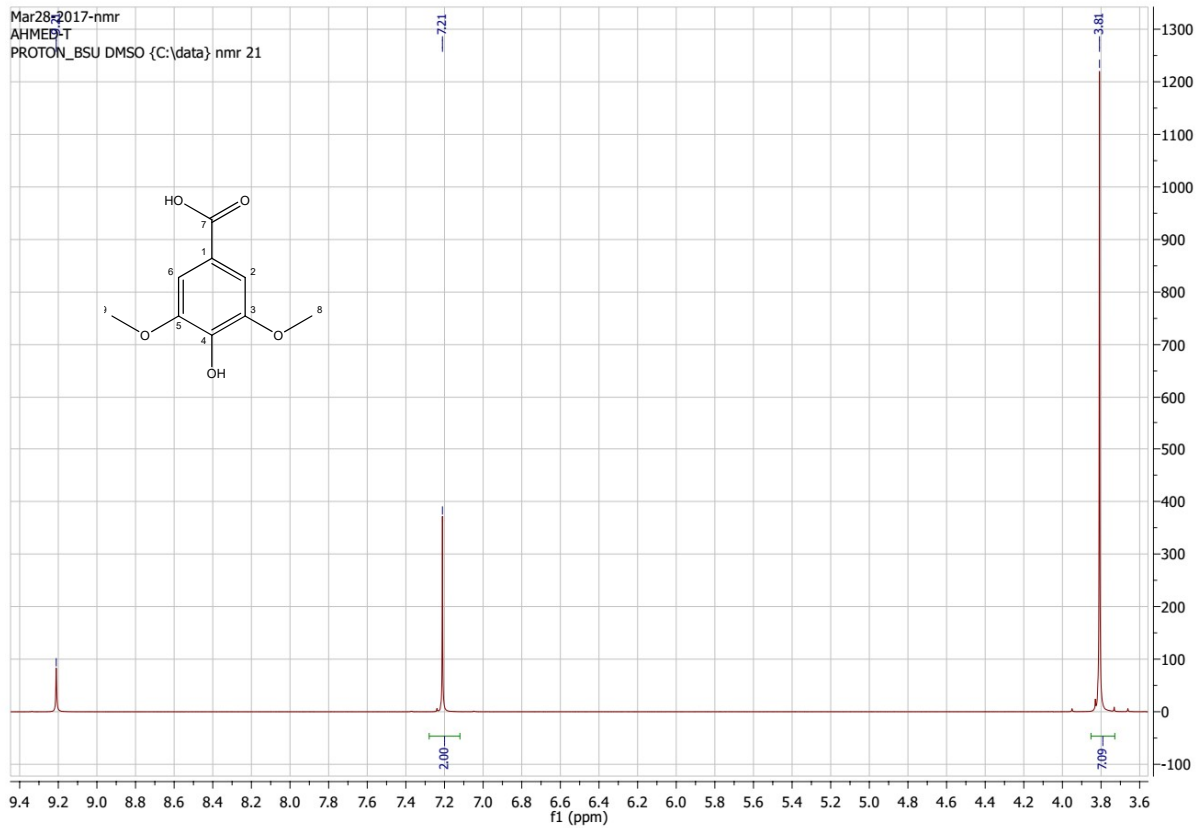

Fig. S13. <sup>1</sup>H NMR spectrum of syringic acid (4) in DMSO-*d*<sub>6</sub>

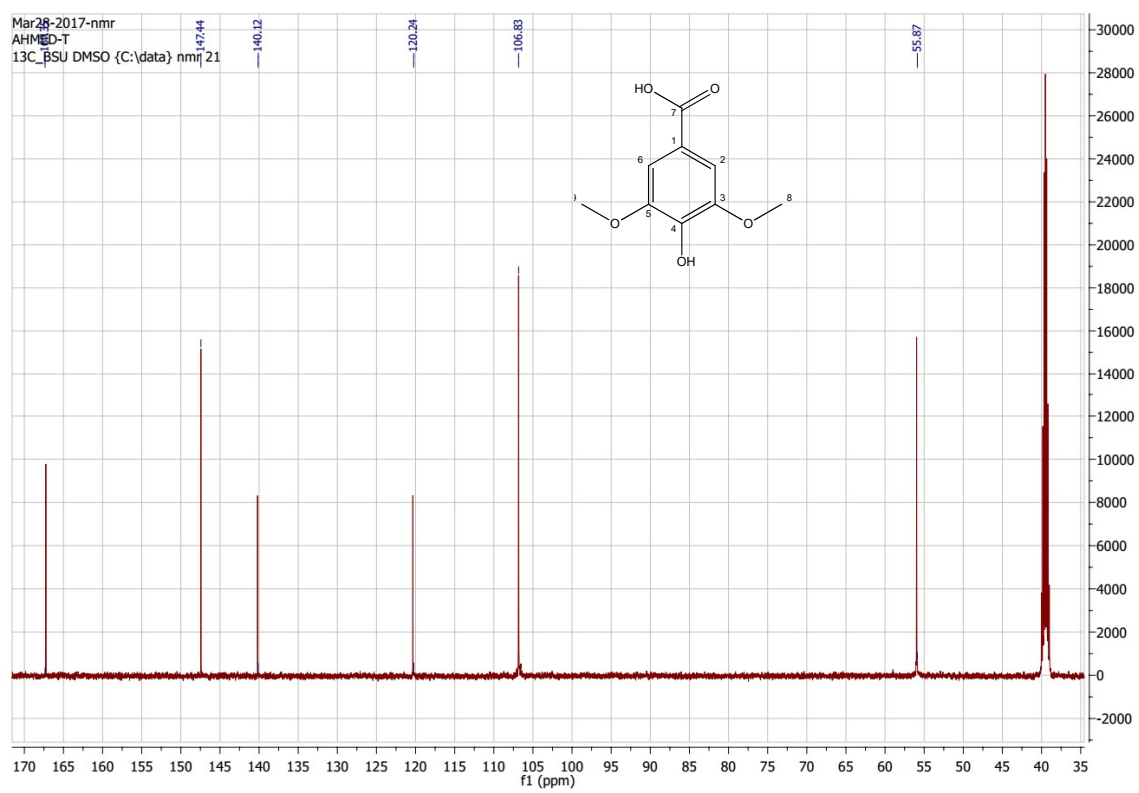

Fig. S14. <sup>13</sup>C NMR spectrum of syringic acid (4) in DMSO-*d*<sub>6</sub>

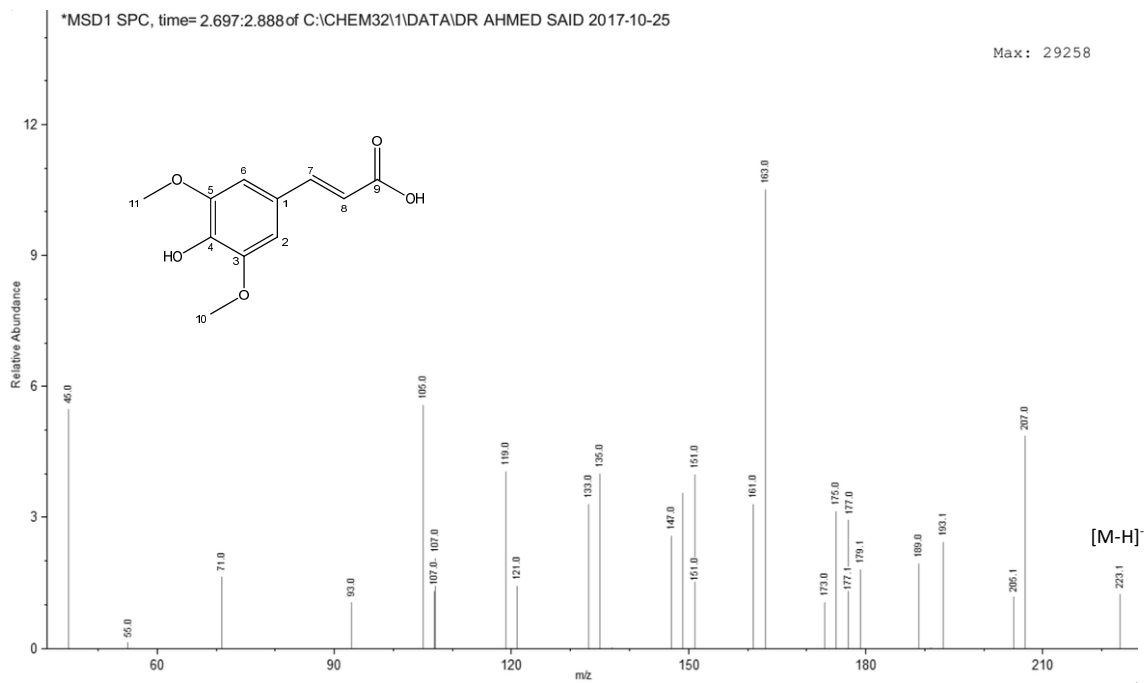

**Fig. S15. ESI-MS spectrum of sinapic acid (5)**



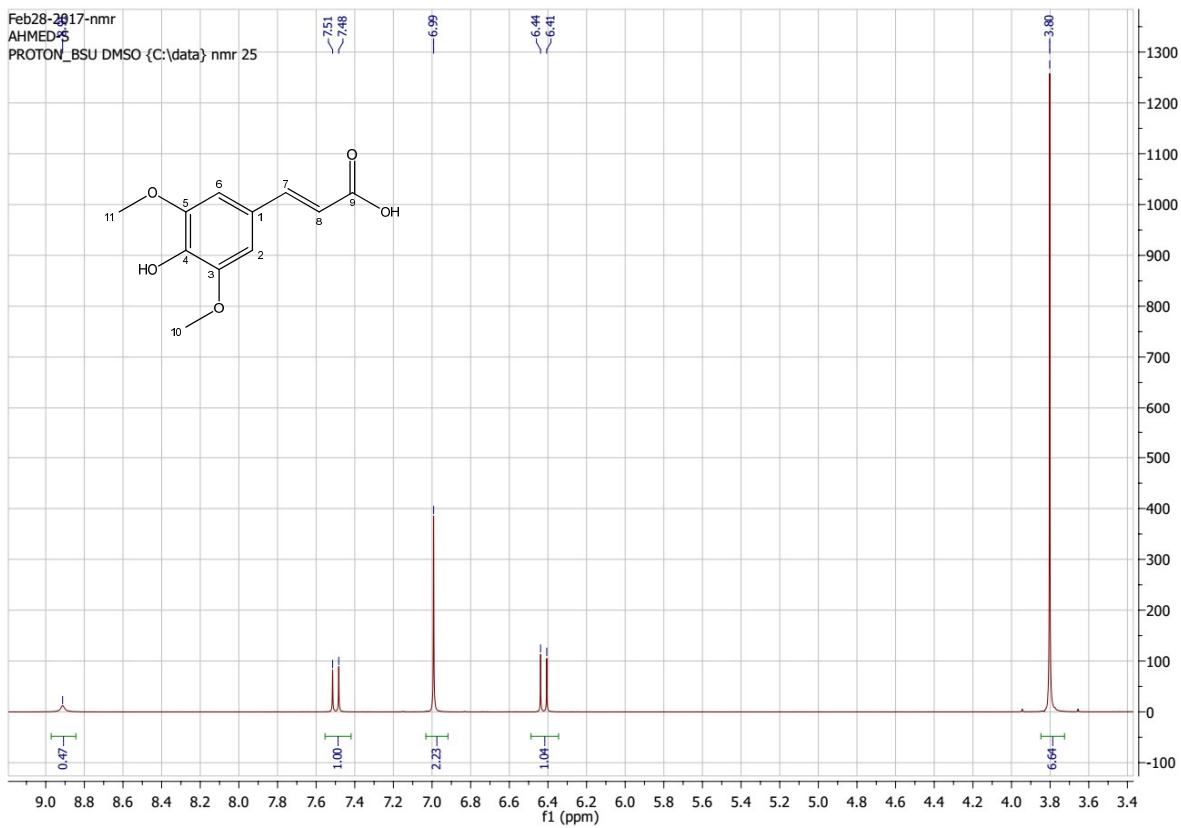

Fig. S16. <sup>1</sup>H NMR spectrum of sinapic acid (5) in DMSO-*d*<sub>6</sub>

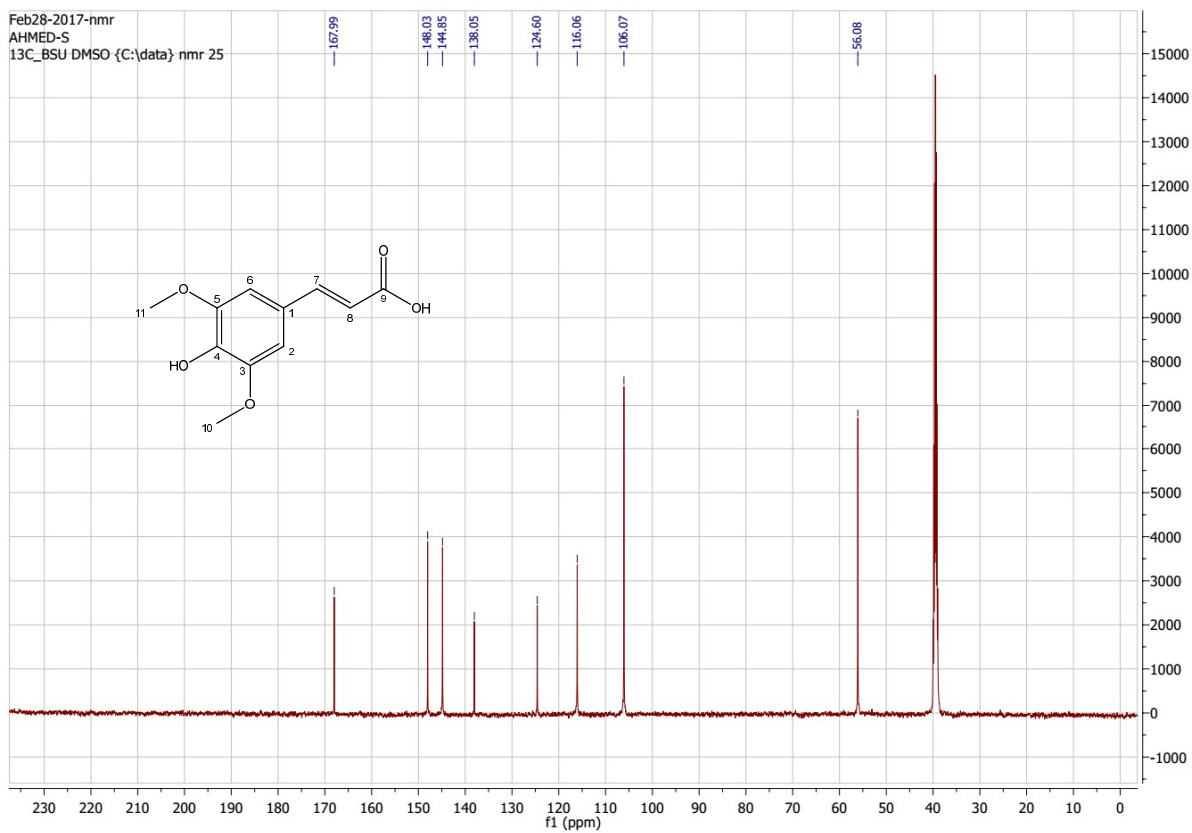

Fig. S17. <sup>13</sup>C NMR spectrum of of sinapic acid (5) in DMSO-*d*<sub>6</sub>

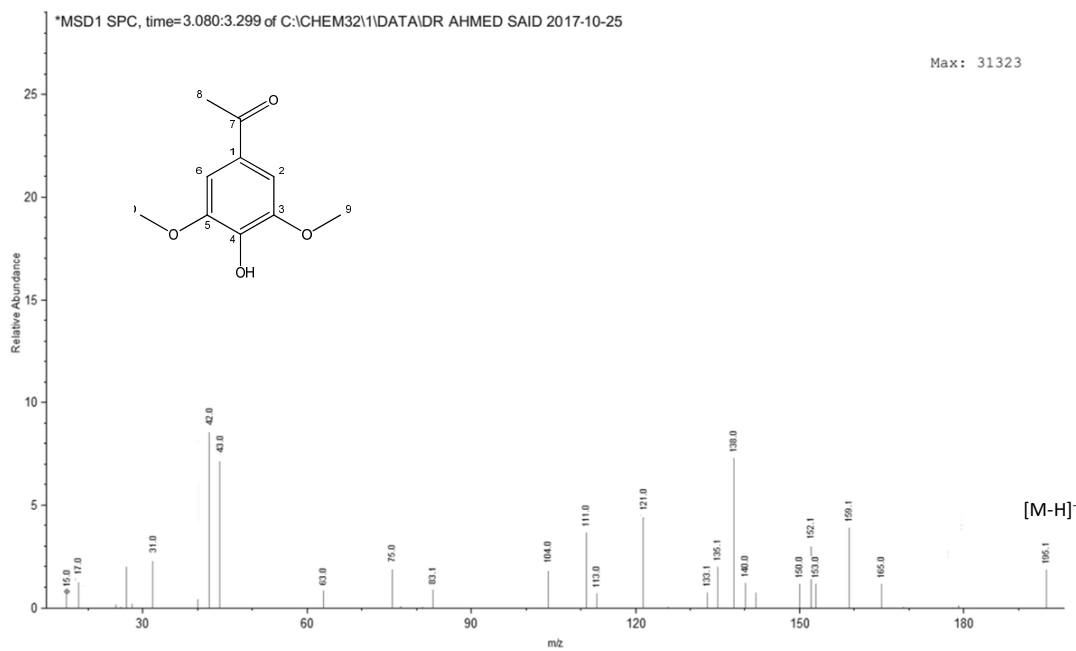

**Fig. S18. ESI-MS spectrum of acetosyringone (6)**

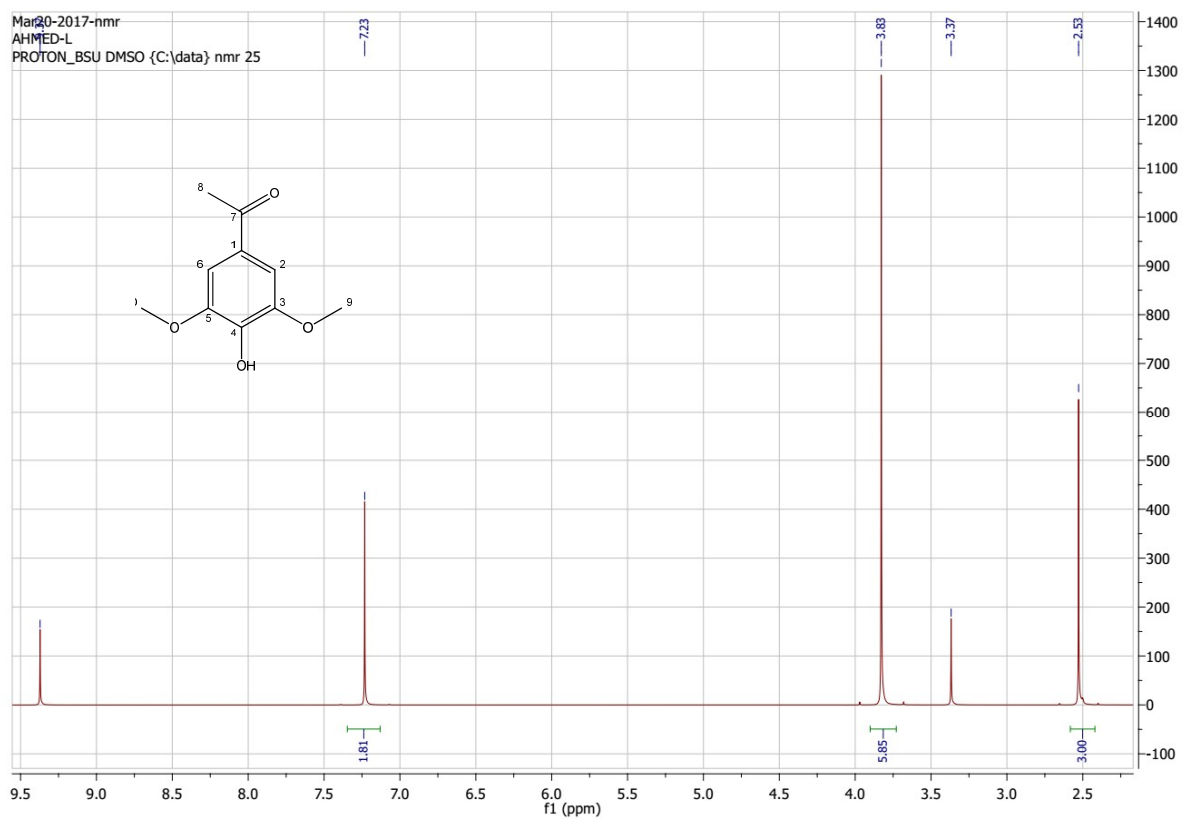

**Fig. S19.** <sup>1</sup>H NMR spectrum of acetosyringone (6) in DMSO-*d*<sub>6</sub>

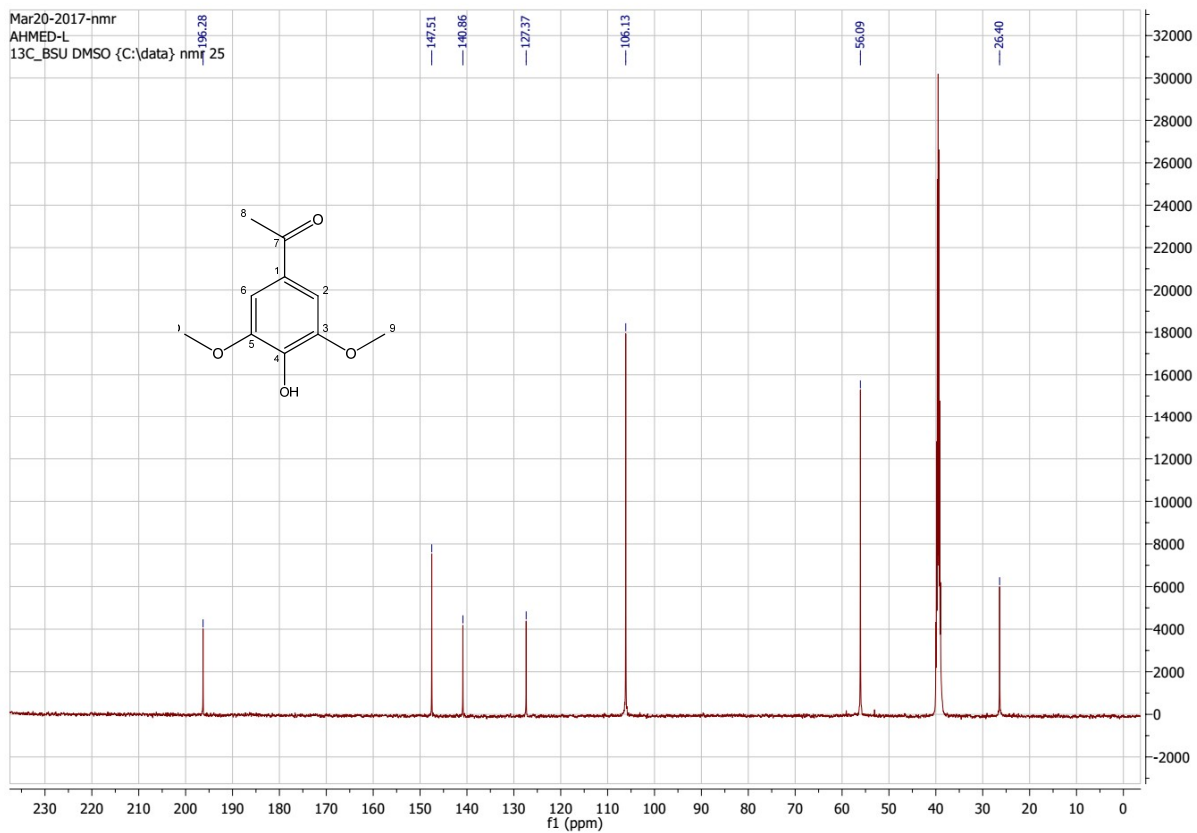

**Fig. S20.**  $^{13}\text{C}$  NMR spectrum of acetosyringone (**6**) in  $\text{DMSO-}d_6$

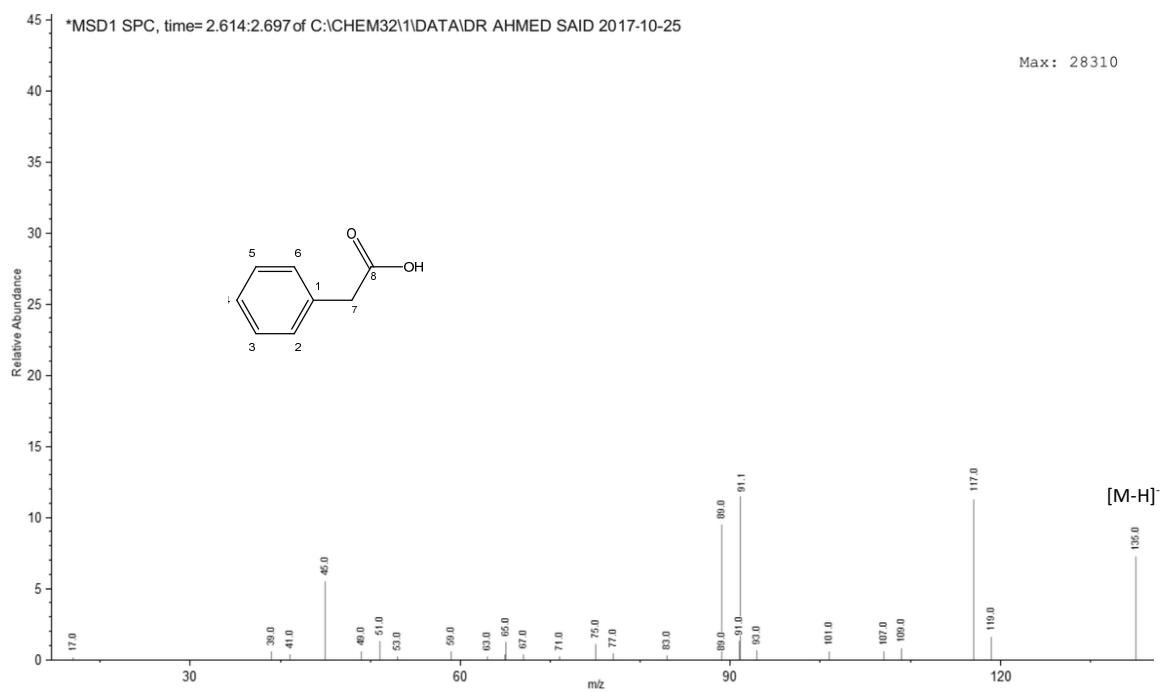

Fig. S21. ESI-MS spectrum of phenyl acetic acid (7)

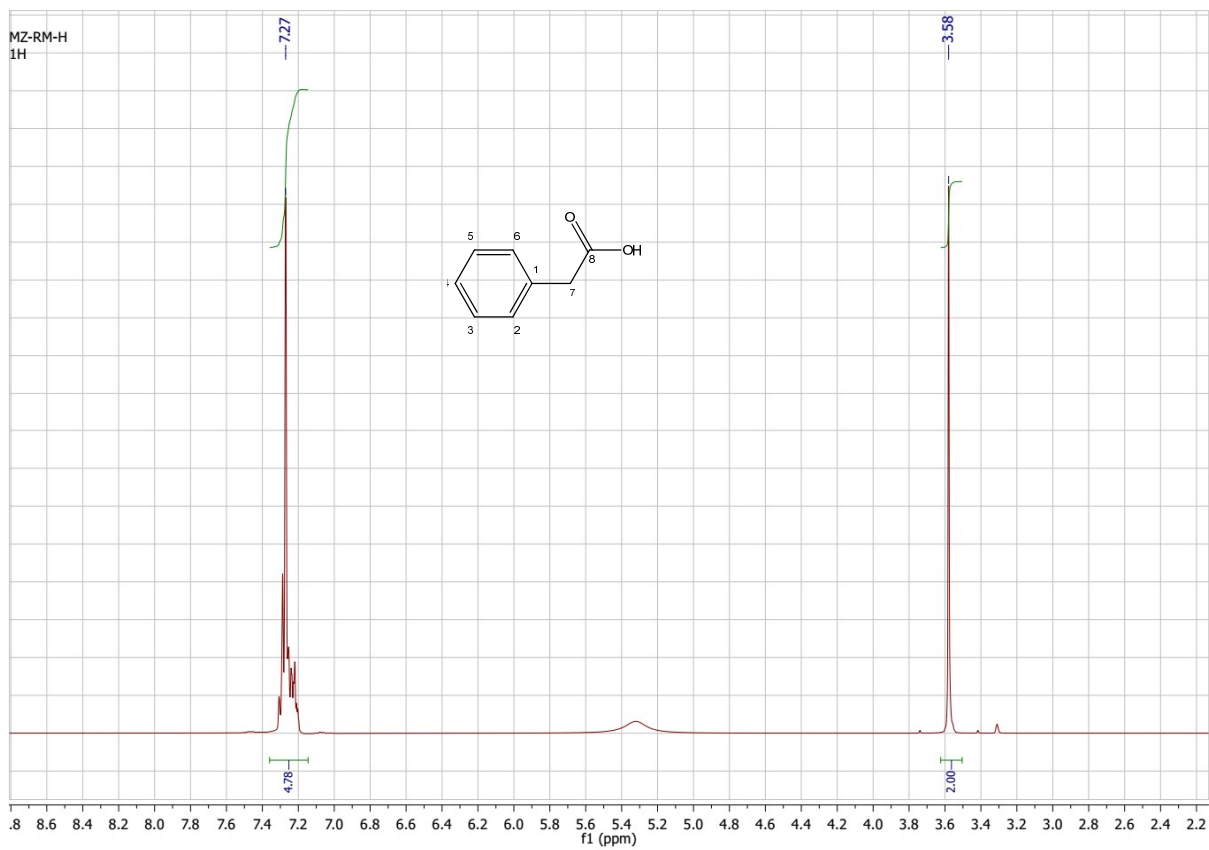

Fig. S22. <sup>1</sup>H NMR spectrum of phenyl acetic acid (7) in CD<sub>3</sub>OD

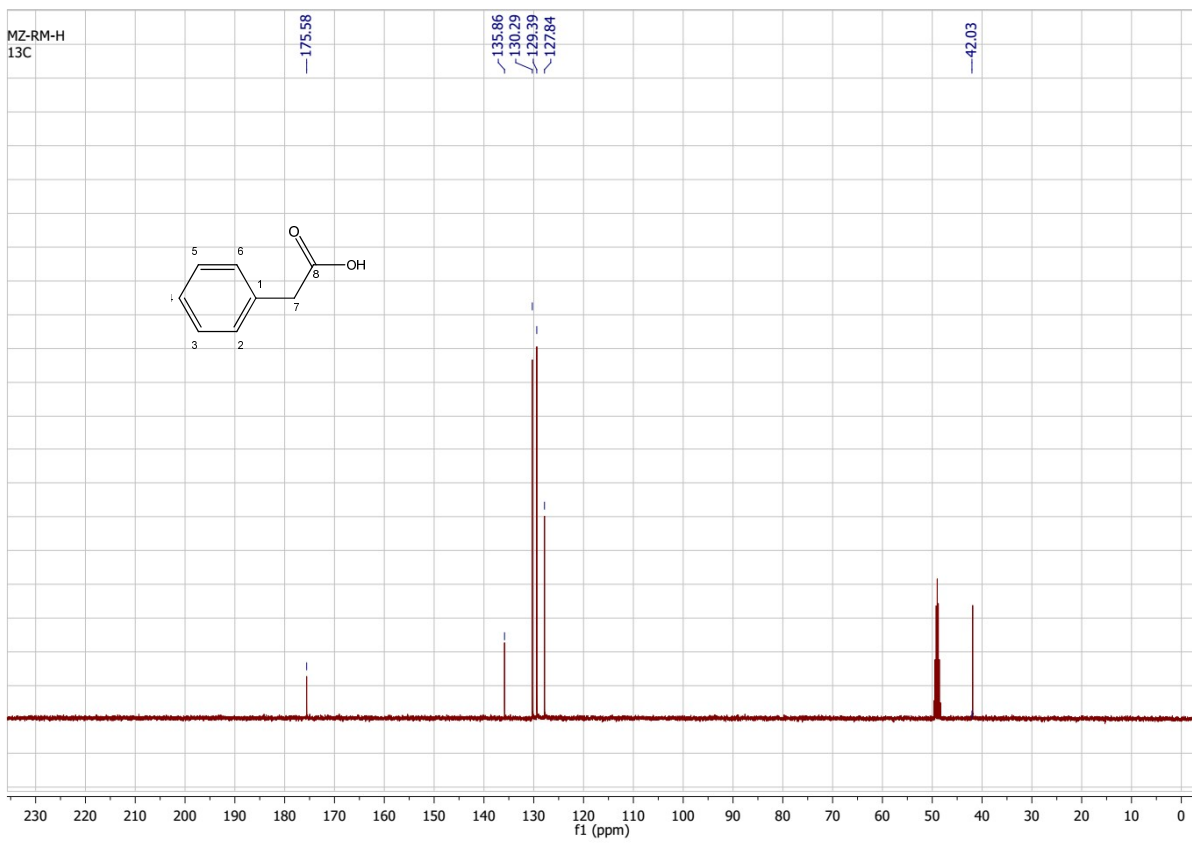

**Fig. S23.** <sup>13</sup>C NMR spectrum of phenyl acetic acid (7) in CD<sub>3</sub>OD



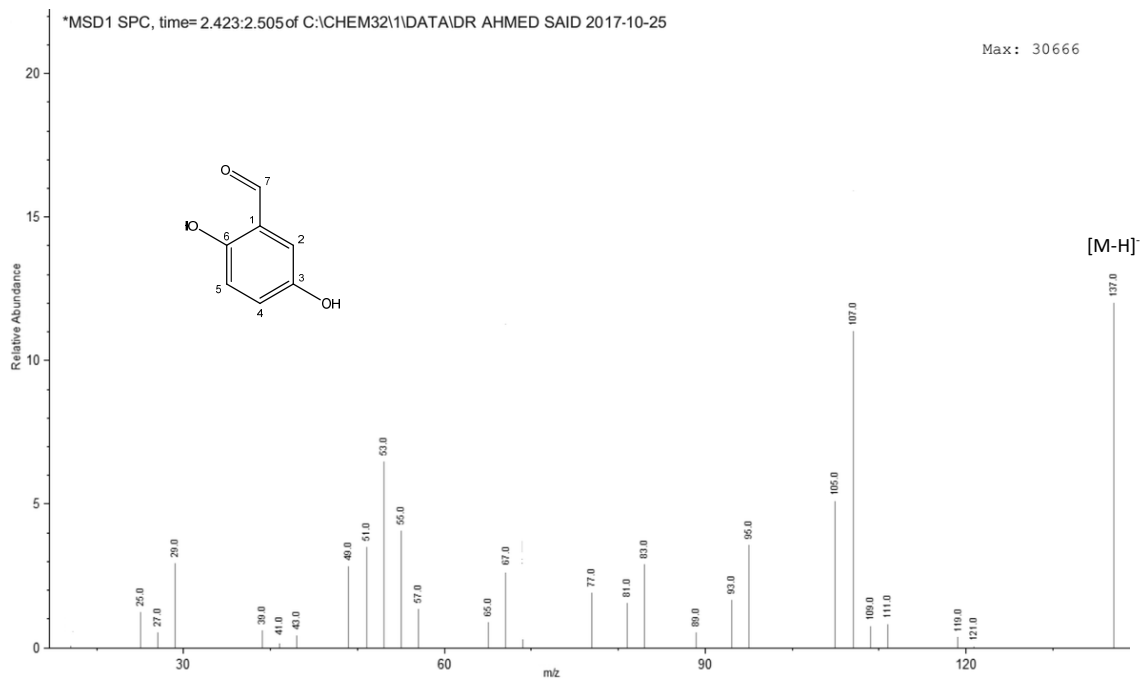

**Fig. S24. ESI-MS spectrum of gentisaldehyde (8)**

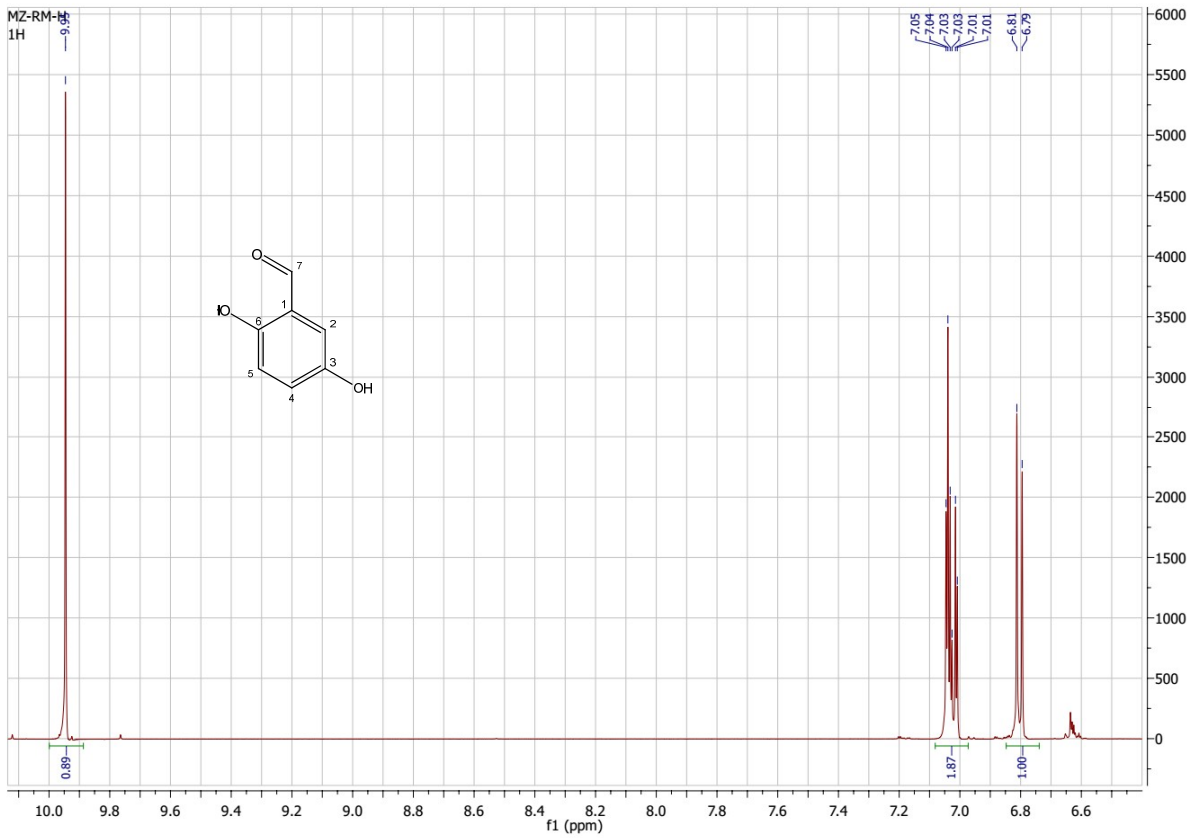

Fig. S25.  $^1\text{H}$  NMR spectrum of gentisaldehyde (8) in  $\text{CD}_3\text{OD}$

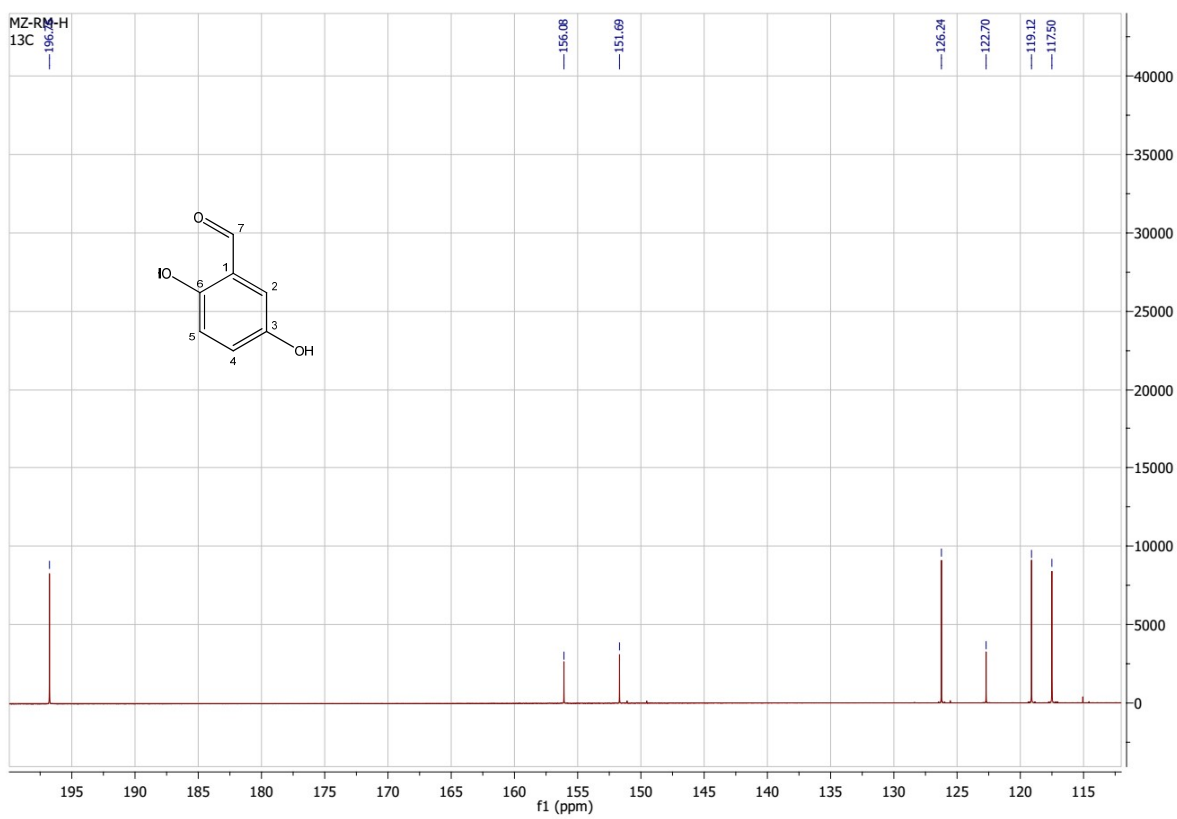

Fig. S26.  $^{13}\text{C}$  NMR spectrum of gentisaldehyde (8) in  $\text{CD}_3\text{OD}$

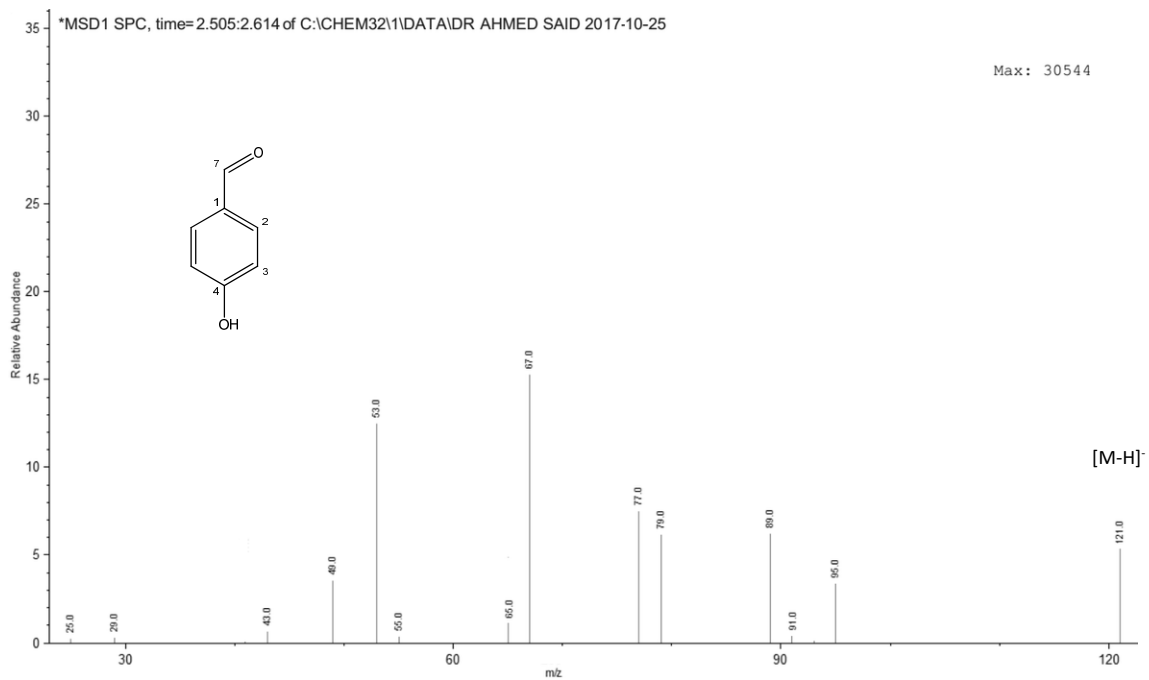

Fig. S27. ESI-MS spectrum of *p*-hydroxy benzaldehyde (9)

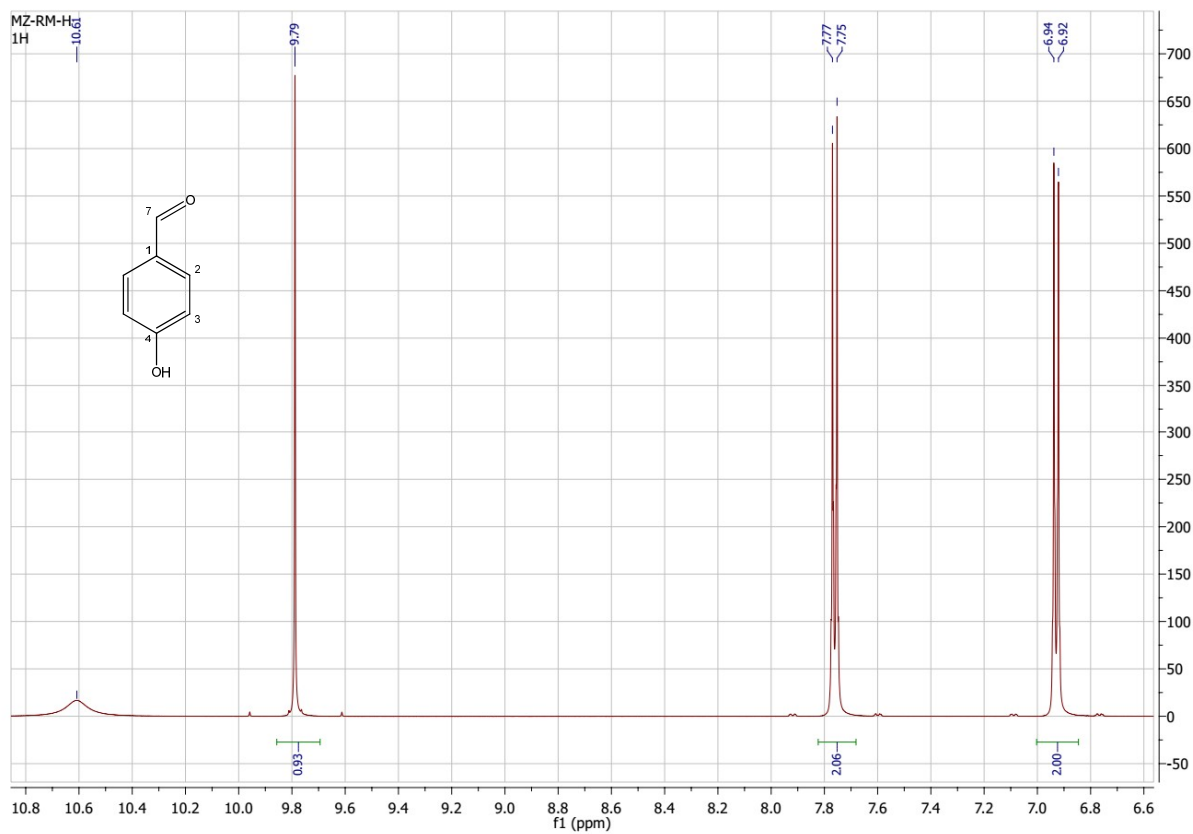

Fig. S28.  $^1\text{H}$  NMR spectrum of *p*-hydroxy benzaldehyde (9) in  $\text{DMSO-}d_6$

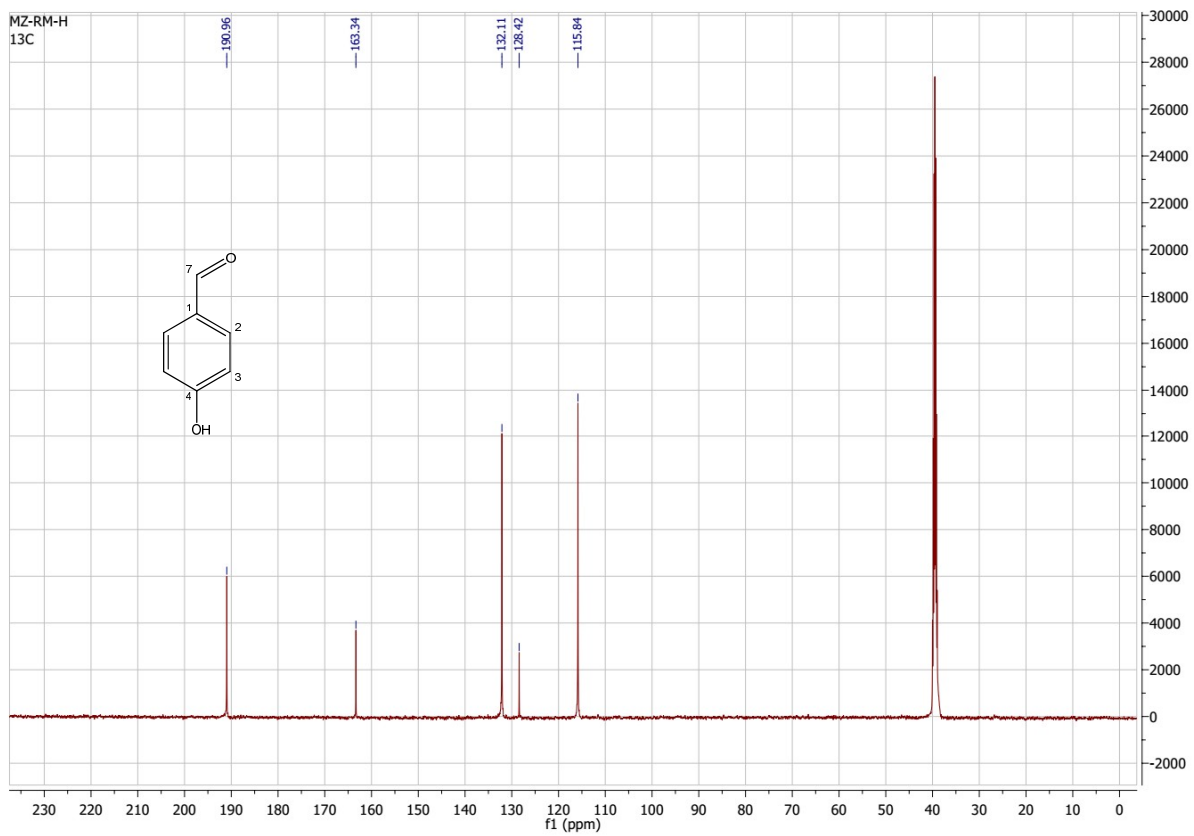

Fig. S29.  $^{13}\text{C}$  NMR spectrum of *p*-hydroxy benzaldehyde (9) in  $\text{DMSO-}d_6$

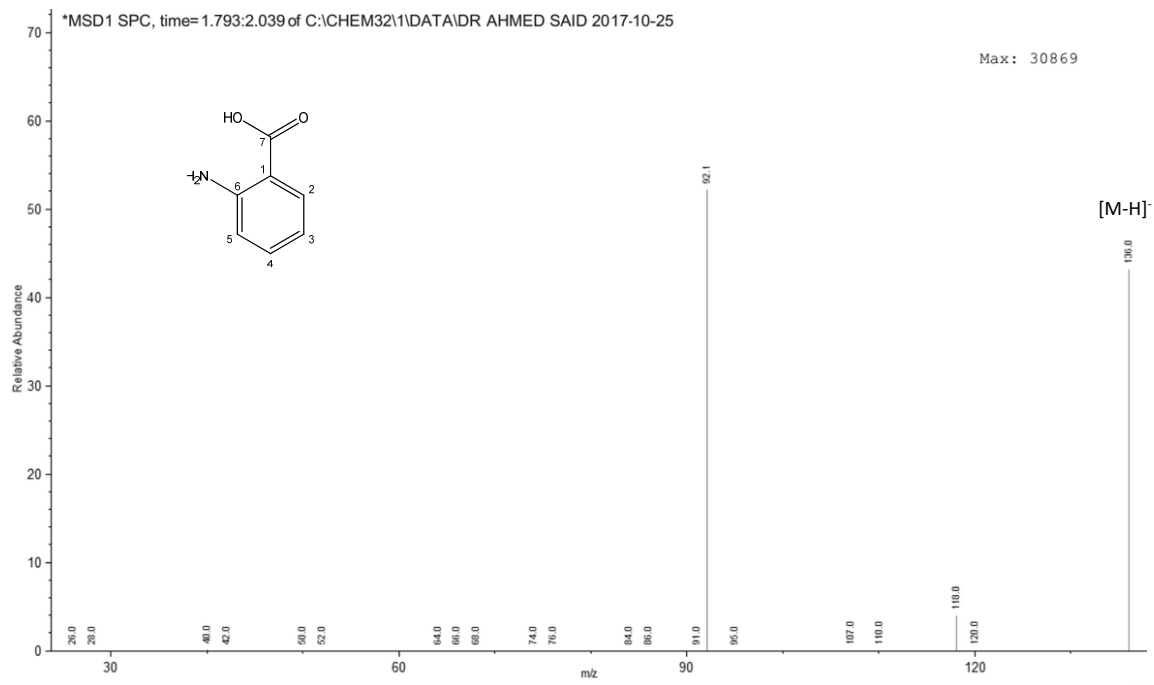

**Fig. S30. ESI-MS spectrum of anthranilic acid (10)**

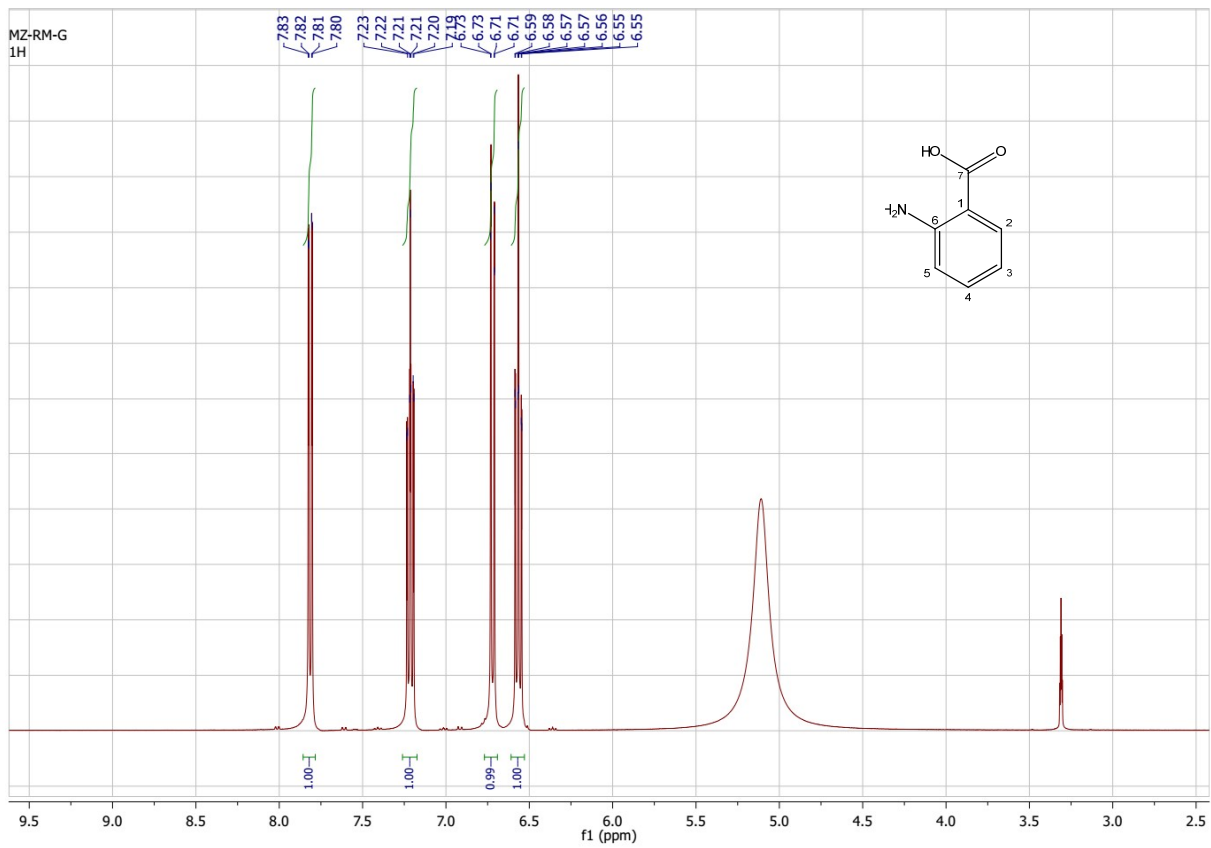

**Fig. S31.**  $^1\text{H}$  NMR spectrum of anthranilic acid (10) in  $\text{CD}_3\text{OD}$



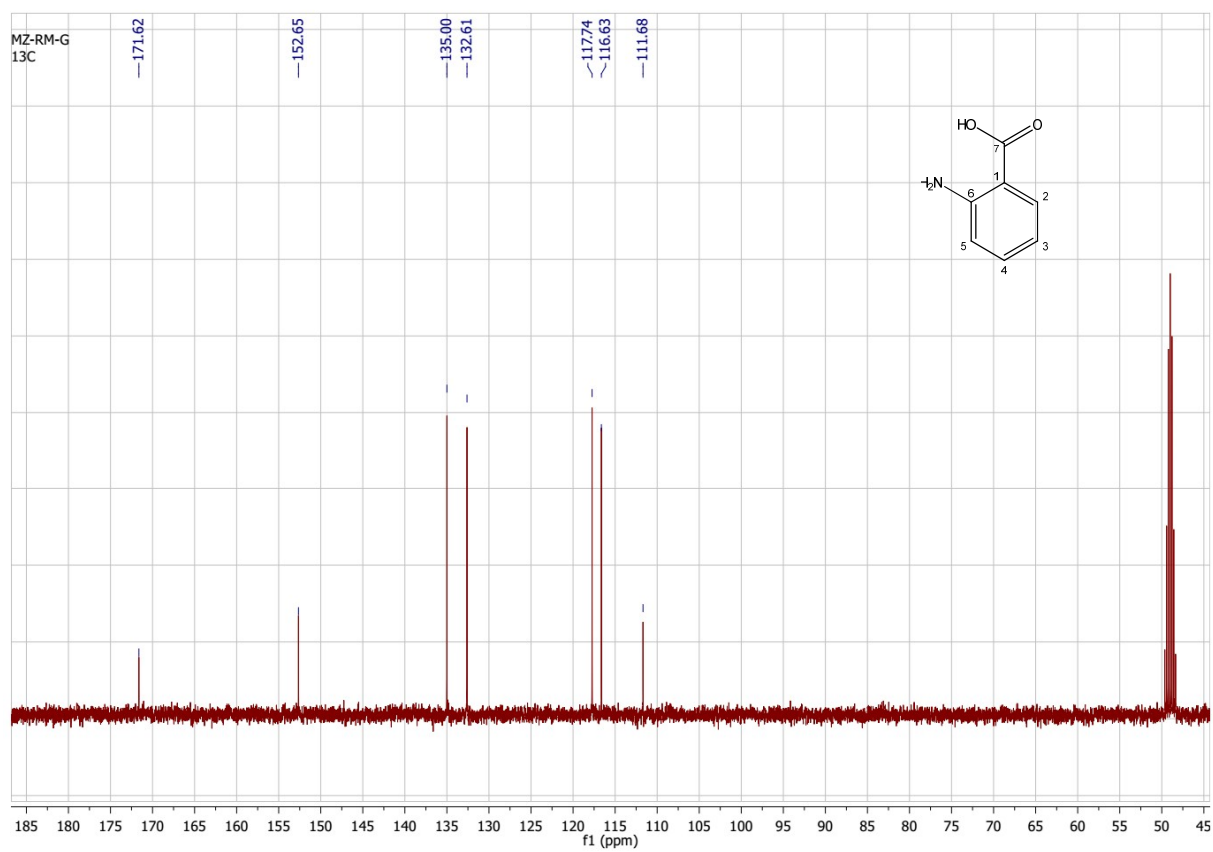

Fig. S32. <sup>13</sup>C NMR spectrum of anthranilic acid (10) in CD<sub>3</sub>OD

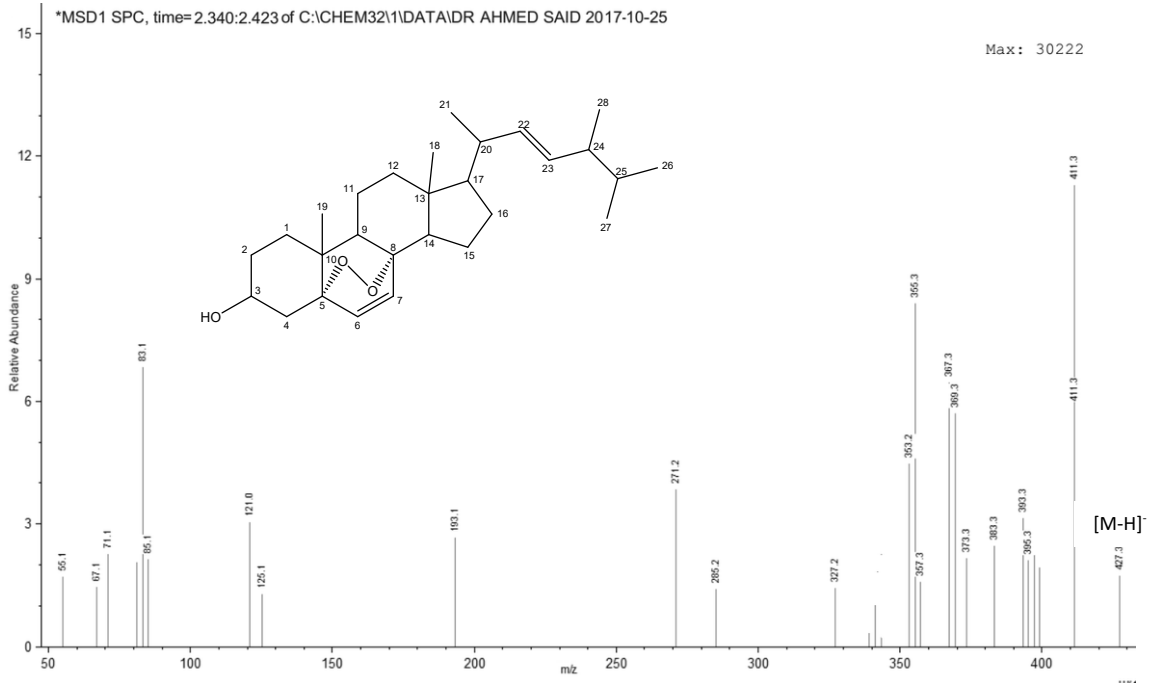

Fig. S33. ESI-MS spectrum of ergosterol peroxide (11)

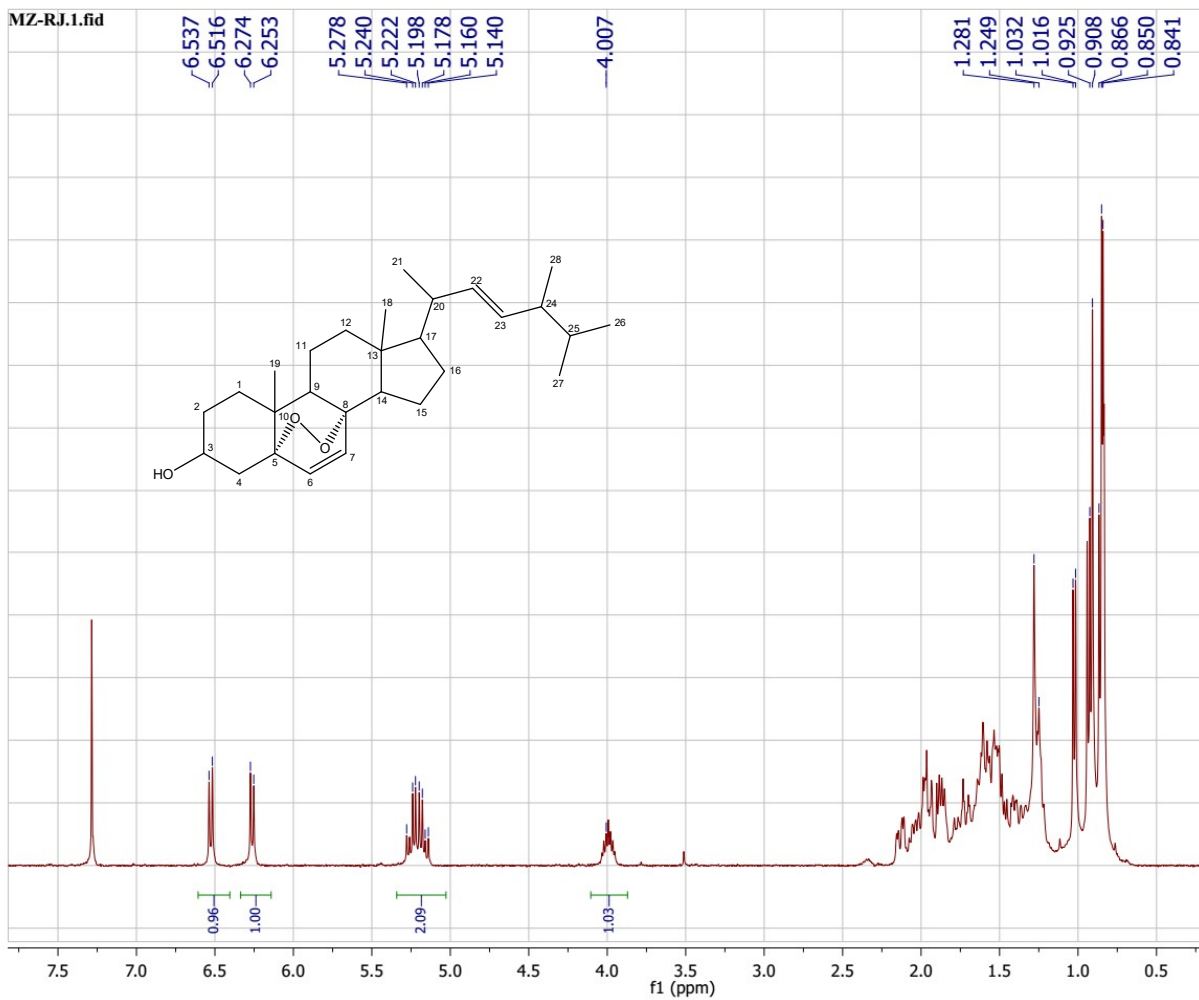

Fig. S34.  $^1\text{H}$  NMR spectrum of ergosterol peroxide (11) in  $\text{CDCl}_3$

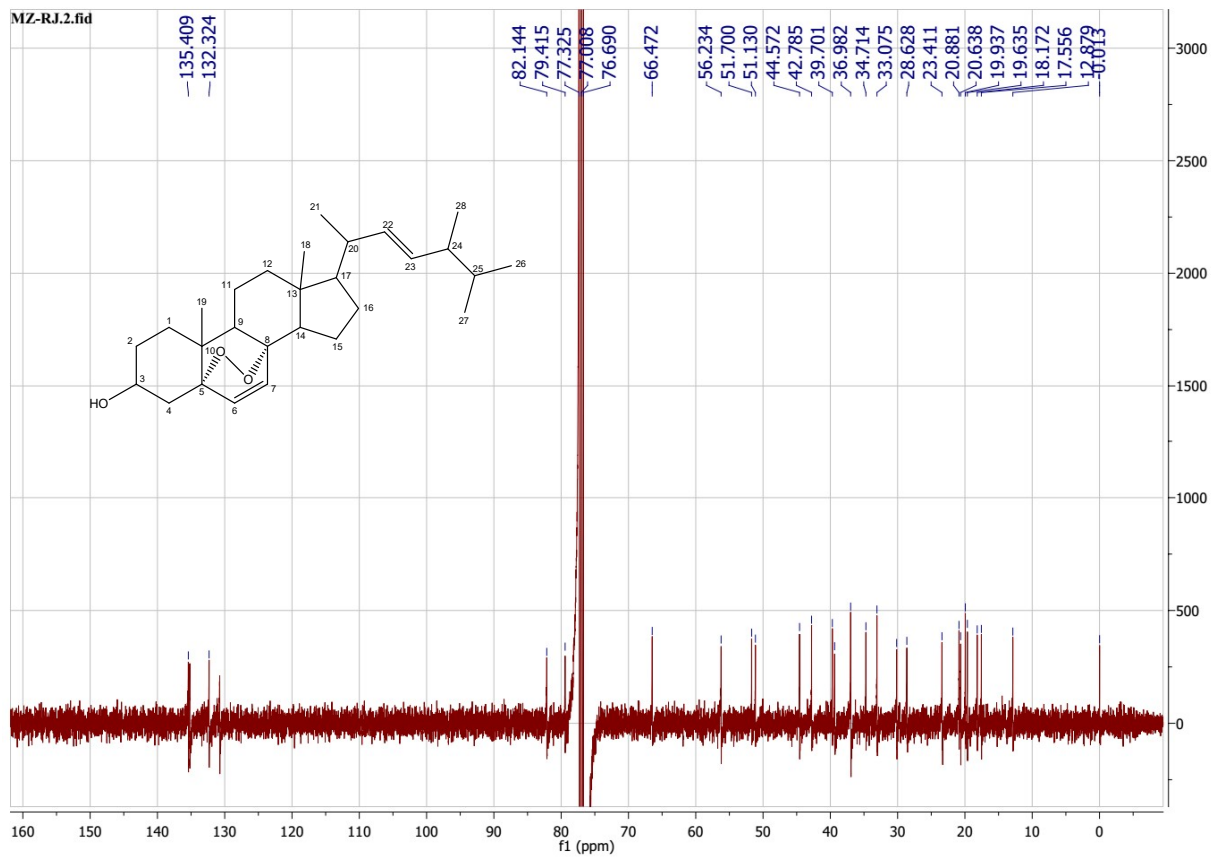

Fig. S35.  $^{13}\text{C}$  NMR spectrum of ergosterol peroxide (11) in  $\text{CDCl}_3$

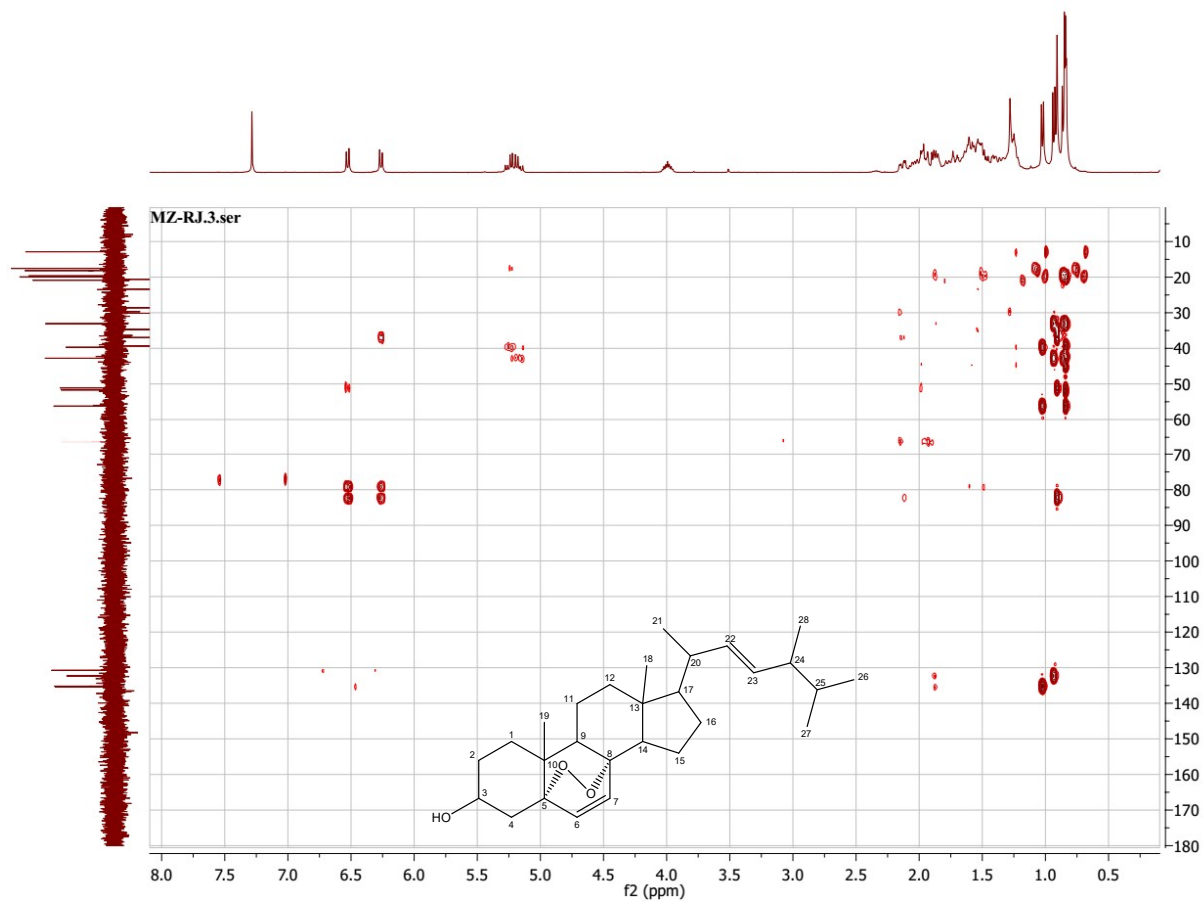

Fig. S36. HSQC spectrum of ergosterol peroxide (11) in  $\text{CDCl}_3$

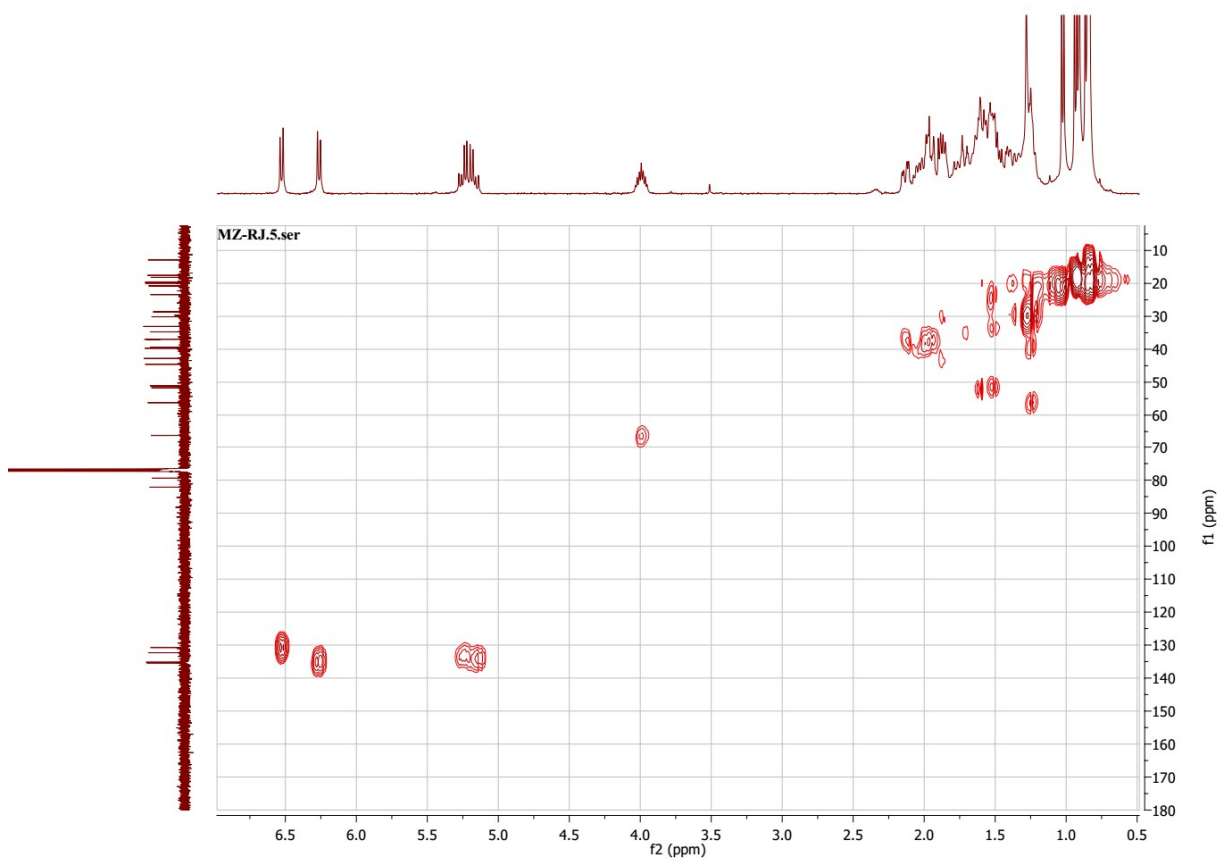

**Fig. S37. HMBC spectrum of ergosterol peroxide (11) in CDCl<sub>3</sub>**

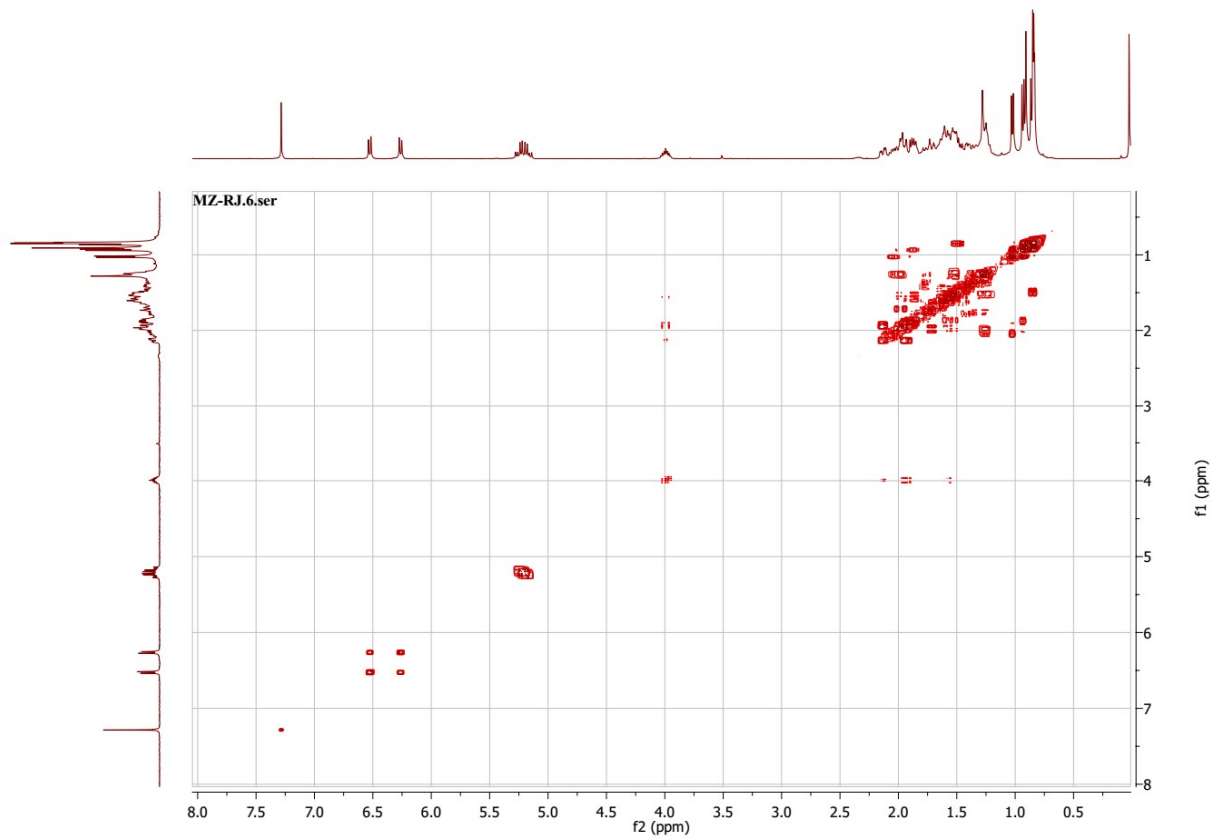

Fig. S38. COSY spectrum of ergosterol peroxide (11) in  $\text{CDCl}_3$

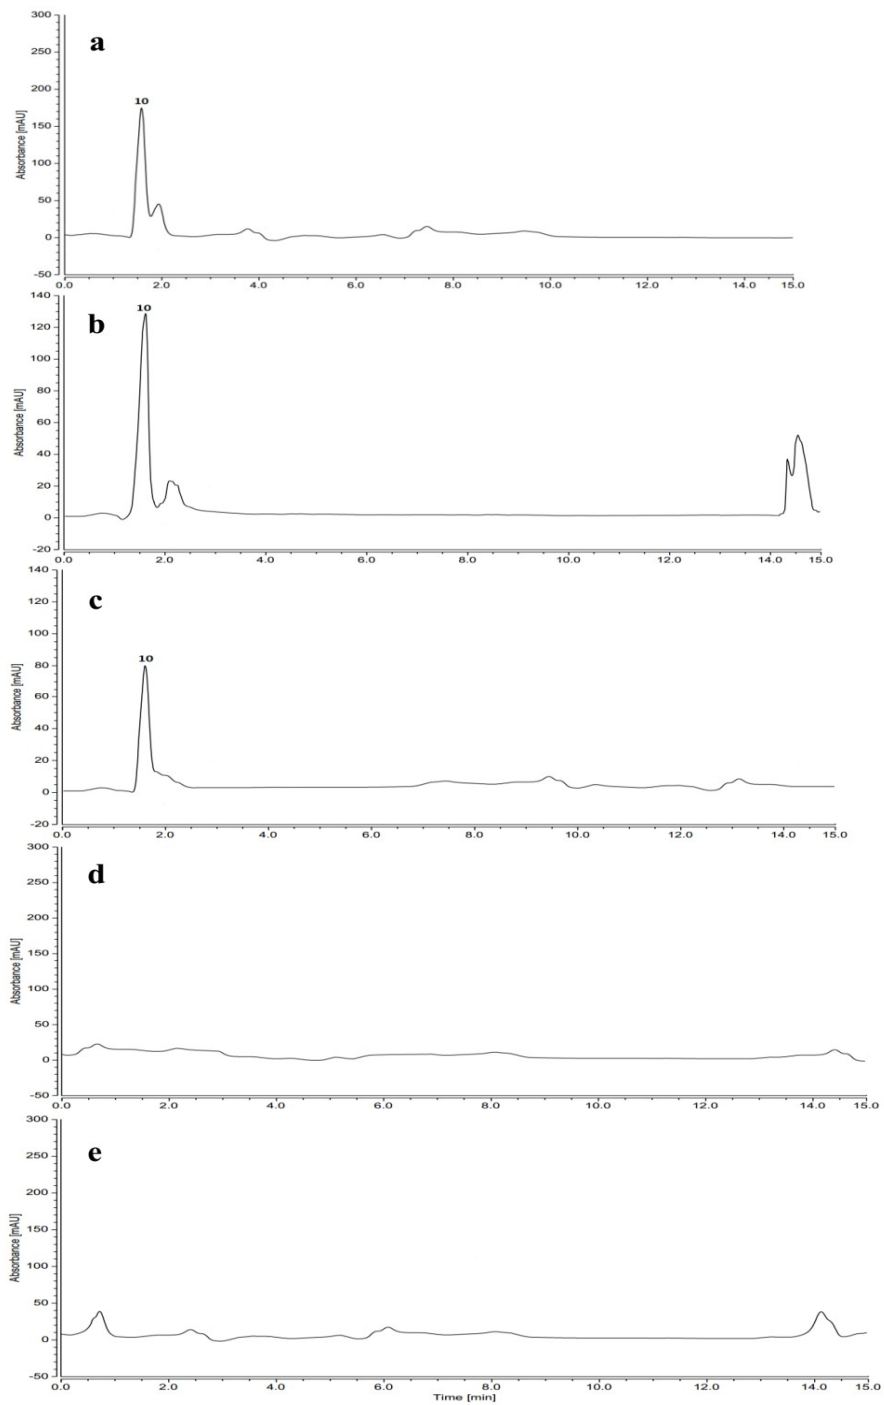

**Figure S39.** HPLC profiles (detected at 254 nm) of fungal extracts obtained from different culture media. (a) rice; (b) sabouraud Dextrose; (c) Czapek Dox; (d) malt extract; (e) malt extract + salt.



**Table S1. Results of the ten top-scored 3D hypothetical pharmacophores generation with information of statistical significance.**

| <b>Hypothesis</b> | <b>Score</b> | <b>F value</b> | <b>degree of freedom</b> |
|-------------------|--------------|----------------|--------------------------|
| Hypo 1            | 72.82        | -108.99        | 0.0                      |
| Hypo 2            | 71.54        | -101.46        | 7.52                     |
| Hypo 3            | 69.74        | -101.70        | 7.28                     |
| Hypo4             | 65.56        | 95.43          | 13.56                    |
| Hypo 5            | 64.83        | 95.20          | 13.78                    |
| Hypo 6            | 63.27        | 92.67          | 16.31                    |
